# 1    Going down the rabbit hole: a review on methods characterizing selection and 2    demography in natural populations

3    **Running title:** Linking evolution and genome-wide data

4    Yann X.C. Bourgeois<sup>1</sup>, Khaled M. Hazzouri<sup>1</sup>, Ben H. Warren<sup>2</sup>

5    <sup>1</sup>**New York University Abu Dhabi**, PO Box 129188, Saadiyat Island, Abu Dhabi, United  
6    Arab Emirates

7    <sup>2</sup>Department of Systematic and Evolutionary Botany, University of Zurich, Zollikerstrasse 107, 8008  
8    Zurich, Switzerland

## 10    Abstract

11        1. Characterizing species history and identifying loci underlying local adaptation is  
12        crucial in functional ecology, evolutionary biology, conservation and agronomy. The  
13        ongoing and constant improvement of next-generation sequencing (NGS) techniques  
14        has facilitated the production of an ever-increasing number of genetic markers across  
15        genomes of non-model species.

16        2. The study of variation in these markers across natural populations has deepened the  
17        understanding of how population history and selection act on genomes. Population  
18        genomics now provides tools to better integrate selection into a historical framework,  
19        and take into account selection when reconstructing demographic history. However,  
20        this improvement has come with a burst of analytical tools that can confuse users.

21        3. Such confusion can limit the amount of information effectively retrieved from  
22        complex genomic datasets. In addition, the lack of a unified analytical pipeline impairs  
23        the diffusion of the most recent analytical tools into fields like conservation biology.

24        4. To address this need, we describe possible analytical protocols and link these with  
25        more than 70 methods dealing with genome-scale datasets. We summarise the

26 strategies they use to infer demographic history and selection, and discuss some of  
27 their limitations. A website listing these methods is available at  
28 [www.methodspopgen.com](http://www.methodspopgen.com).

## 29 Keywords

## 30 Coalescent, Software, Molecular evolution

## 31 Introduction

32 Multiple historical and selective factors shape the genetic makeup of populations. The advent  
33 of Next-Generation Sequencing (NGS) in the last 10 years has enhanced our understanding on  
34 how intermingled these factors are, and how they can impact genomic variation. Important  
35 results have been gathered on model species, or species of economic interest. Such results  
36 include, among other examples, an improved understanding of the history of human  
37 migrations, admixture and adaptation (e.g. Sabeti *et al.*, 2002; Abi-Rached *et al.*, 2011; Li and  
38 Durbin, 2011), the origin of domesticated species (e.g. Axelsson *et al.*, 2013; Schubert *et al.*,  
39 2014), and the genetic basis of local adaptation in both model and non-model species (e.g.  
40 Legrand *et al.*, 2009; Kolaczowski *et al.*, 2011; Roux *et al.*, 2013; Kubota *et al.*, 2015). The  
41 amount of population genomic data that is aimed at elucidating the history of natural  
42 populations has increased enormously in the last five years, even for non-model species.  
43 Studying genetic variation at the genome level allows the demographic factors shaping  
44 species history to be characterised. Further, understanding demographic history is important  
45 in correctly identifying loci under selection. Such data can even help in conservation efforts  
46 by identifying locally adapted genes that can be used to define relevant conservation units  
47 (Fraser and Bernatchez, 2001).

48

49 In the last 10 years, developments in NGS have continually improved the throughput of data,  
50 while reducing time and cost of their production. These methods have become more  
51 affordable for teams studying evolutionary processes in biology, and many new methods to  
52 infer demography and selection have been developed. However, these methodological  
53 advances have brought increased analytical complexity to the field, and an inflation in the  
54 number of methods covering any one topic. As a consequence, it has become increasingly  
55 difficult for all potential users to follow developments and be sure of selecting the most  
56 appropriate method for the question and data in hand.

57

58 An overarching theme that concerns new users in a wide range of contexts is understanding  
59 patterns of heterogenous diversity along the genome. Patterns of nucleotide variation in  
60 genomes are shaped by both intrinsic and extrinsic factors. Even within a single isolated  
61 panmictic population, interaction between recombination, selection and historical variation in  
62 population size will lead to heterogeneous diversity along the genome. At the scale of several  
63 connected populations or even between emerging species, these processes will affect the rate  
64 at which migration homogenizes the genome (Wolf and Ellegren, 2016).

65

66 A prime example is the situation of a researcher primarily interested in identifying signatures  
67 of recent positive selection in a species of interest. Since a new mutation will see its frequency  
68 increase in a population where it provides a selective advantage (*i.e.* hard selective sweep), a  
69 large region around it can remain uniform, especially if selection is strong (Sabeti *et al.*, 2002;  
70 McVean, 2007; Vitti *et al.*, 2013). This can lead to an increase in linkage disequilibrium (LD)  
71 between variants associated to the advantageous mutation, as well as a decrease in the age of  
72 the positively selected alleles and their nucleotide diversity. If positive selection occurs only

73 in some populations, it may be possible to observe an increase in differentiation at this locus  
 74 (Charlesworth *et al.*, 1997). To detect this signature of selection, some methods can track  
 75 particularly long haplotypes and linkage disequilibrium along the genome. Others will rather  
 76 focus on allele frequency spectrum and nucleotide diversity. Association methods will take  
 77 advantage of preliminary knowledge of a phenotype or environment to identify loci displaying  
 78 correlated allele frequencies. A few methods aim at inferring the whole history of coalescence  
 79 and recombination along genomes, but still make simplifying assumptions and often require  
 80 whole-genome resequencing data, which remain unaffordable for many teams.

81

82 Therefore, the choice of methods of any such researcher will depend on the available data and  
 83 specifics of the question being addressed. One key aspect is that all these methods and  
 84 questions do not have the same requirements in terms of reference genomes and marker  
 85 density. For example, recent discussion of RAD-markers has been interesting from this  
 86 perspective (Lowry *et al.*, 2016; Catchen *et al.*, 2017). The density of markers obtained along  
 87 a genome depends on the choice of the restriction enzyme, and this choice must take into  
 88 account the average extent of LD. Genome scans of selection will lose power if this density is  
 89 not enough to cover mutations in strong linkage with variants under selection.

90

91 In the absence of any unified framework, combining several tools is necessary to interpret  
 92 results. It must be borne in mind that recombination rates vary along the genome, which can  
 93 possibly bias tests based on LD. It can therefore be important to characterize the  
 94 recombination landscape in natural populations, requiring the use of another method (e.g.  
 95 LDHat, Table 1). Background selection can lead to signatures of high differentiation that  
 96 mimick disruptive selection (Charlesworth *et al.*, 1997). An assessment of genetic diversity

97 within populations, haplotype frequencies and possibly association with phenotype in each  
 98 population would therefore be needed to explore this possibility (Charlesworth *et al.*, 1997).  
 99 Demographic history impacts patterns of LD, allele age and frequencies at the genome scale,  
 100 and affects the efficiency of selection at specific genes. This calls for at least basic checking  
 101 of demographic structure and history and ideally building neutral demographic models to  
 102 estimate the expected frequency of outliers without involving selection. In addition, most  
 103 methods estimating selection coefficients require estimating effective population sizes.  
 104 Finally, including markers under selection can bias demographic inference by skewing allele  
 105 frequency spectra and LD, which requires careful data filtering and removal of outliers.

106

107 In this simplified example, we see that a reciprocal feedback between different aspects of  
 108 evolutionary genomics is needed (Figure 1). Combining approaches is one of the current  
 109 grand challenges in evolutionary biology (Cushman, 2014). While large-scale collaborations  
 110 and sharing of skills between researchers allow for detailed analyses, a regularly updated list  
 111 of methods would be valuable for smaller research teams to quickly start new projects and  
 112 evaluate their experimental design.

113

114 In addition to methodological and technical challenges, the widespread use of sophisticated  
 115 analytical tools is made difficult by the lack of communication between fields (Shafer *et al.*,  
 116 2015), little user-friendliness of software, inflation of data formats (Lischer and Excoffier,  
 117 2012) and the ever-increasing number of methods made available. Fields like landscape  
 118 genetics and phylogeography have largely focussed on identifying general patterns in  
 119 populations history and species diversification. Other researchers are more interested in  
 120 identifying specific genes that are involved in adaptation in natural populations. All these

views contribute to our understanding of causation in biology, an effort that has included genetics, developmental science and ecology (Laland *et al.*, 2011). A global summary of methods used in these different fields would therefore facilitate communication between disciplines.

The last extensive review of methods in population genetics was performed 10 years ago (Excoffier and Heckel, 2006). Since then there has been increasing drive to translate these methods into approaches applicable to genomic data and non-model species. This drive has confirmed the value of population genomics on non-model species in understanding biological diversity at various scales (Mandoli and Olmstead, 2000; Jenner and Wills, 2007; Abzhanov *et al.*, 2008; White *et al.*, 2010; Ellegren *et al.*, 2012; Weber *et al.*, 2013; Poelstra *et al.*, 2014). Such advances are needed to broaden our view about the evolutionary process and improve sampling of distant clades. Ultimately, this process should provide a more balanced picture than the one brought by the study of a few model species (Abzhanov *et al.*, 2008). Genomic approaches also have the potential to improve conservation genetic inference by scaling up the amount of data available (Shafer *et al.*, 2015). Much effort has recently been made in facilitating the diffusion of sometimes complex, state-of-the-art methods. Their application to species with little background data has become more accessible, bringing the potential to add much valuable information.

In this paper, we propose possible pipelines (Figures 1, 2 and 3) to help choose appropriate methods dealing with current questions in population genomics and genetics of adaptation in natural populations. We begin with a succinct review of methods available to obtain genome-wide polymorphism data (Box 1) before focusing on i) methods devoted to the study of

population structure and quantitative characterization of population history (Table 1 and 2) and ii) methods aimed at identifying selected loci (Table 3). We end this review by detailing how these analyses can be combined, and present future directions that may be taken by the field of population genomics. The tables and a summary of the methods discussed in this paper will be kept updated to follow improvements, and are available at [www.methodspopgen.com](http://www.methodspopgen.com).

### Box 1. Common sequencing methods

*RAD-seq*: Reduced representation allows broad sampling of variants across the genome by sequencing DNA fragments flanking restriction sites. Such sampling is not specific to any particular kind of region (e.g. coding or non-coding). Some of the best-known reduced representation techniques include RAD-sequencing (Baird *et al.*, 2008) and Genotyping by Sequencing (GBS; Elshire *et al.*, 2011). Their main interest is their low cost and that they do not require any reference genome (see Davey *et al.*, 2011 for details), although a reference can be useful to identify outlier genomic regions and retrieve linkage disequilibrium information between markers. Use of a reference genome also limits the bias due to paralogy and mapping errors (Hand *et al.*, 2015). Reduced representation allows many individuals to be genotyped at once, and so is widely used for the study of population structure, demography and selection. It does not cover all mutations in the genome and the choice of the restriction enzyme is crucial to control for the density of markers. This choice further controls the mean sequencing depth, the number of mutations close to genes under selection, and the accurate calling of genotypes. The number of SNPs ranges from thousands to millions, which is usually enough to retrieve substantial information about demography and sometimes selection (see Puritz *et al.*, 2014 for a detailed summary of reduced-representation techniques). As a general word of caution, note that RAD-sequencing and related methods display specific properties that can bias genome-

wide estimates of diversity, e.g. allelic dropout (Arnold *et al.*, 2013, Puritz *et al.* 2014). However, this type of marker remains valuable for phylogenetic estimation, even for distantly related species (Cariou *et al.*, 2013), and allelic dropout can be compensated for by focusing only on markers sequenced in all individuals. Variations on the original RADseq protocol have been developed to overcome some of these caveats (ddRAD, Peterson *et al.*, 2012; ezRAD, Toonen *et al.*, 2013; 2b-RAD, Wang *et al.*, 2012). Many pipelines have been specifically designed to account for RAD-seq specificities, including Stacks (Catchen *et al.*, 2011), TASSEL-UNEAK (Lu *et al.*, 2013) or TASSEL-GBS for GBS data (Glaubitz *et al.*, 2014).

*Targeted sequencing:* This class of methods allows sequencing and genotyping the same set of genomic fragments or single nucleotide polymorphisms (SNP arrays) across individuals, and has been recently promoted to study non-model species (Jones and Good, 2016). Since the specificity of the probe does not have to be very high, the same probe can be used among closely related species (Nicholls *et al.*, 2015). Conservation of the target genomic region under study is important. High conservation may lead to higher efficiency of capture but can artificially reduce representation of polymorphic regions. Different technologies allow for targeted sequence capture that can be classified by enrichment methods (hybridization-based; PCR-based; molecular inversion probe-based; see Mamanova *et al.*, 2010). Commercial products, such as Agilent's SureSelect, MYcroarray's MYbaits or Roche NimbleGen's SeqCap offer these methods or a derivation (Grover *et al.*, 2012).

Targeted sequencing reduces the genomic representation compared to whole genome sequencing and it allows for multiple individuals to be multiplexed, lowering the cost of sequencing per sample. In addition, the complexity of analysis is reduced compared to whole genome sequencing (WGS), since only a subset of genomic regions is sequenced. By allowing

an improvement in spatial and temporal sampling, targeted sequencing can reconstruct dispersal routes and migration between varieties and subspecies (Nadeau *et al.*, 2012; da Fonseca *et al.*, 2016). Another commonly used technique includes Single nucleotide polymorphism (SNP) genotyping arrays have frequently been used in studies aimed at detecting phenotype/genotype associations or to study population structure (Gautier *et al.*, 2010; Johnston *et al.*, 2011). However, regenotyping of ascertained SNPs in a new population can lead to bias which can be problematic for demographic inference (Albrechtsen *et al.*, 2010; Lachance and Tishkoff, 2013).

*RNAseq*: RNAseq can be used with and without a reference genome. In the latter case, like any other reduced representation method, it does not provide information of linkage among genes. It has applications on many different evolutionary time scales. Since it mostly sequences coding regions, a deep phylogeny can be constructed with conserved orthologs. Depth of coverage is gene expression dependent, so calling genotypes varies across genes and which must be taken into consideration (Gayral *et al.*, 2013). If a reference genome is available, it is possible to call variants (Piskol *et al.*, 2013). This method is cost-effective and an alternative to whole genome sequencing. However, common variant callers do not behave well with RNAseq due to reads encompassing intronic regions as well as bias introduced during the sequencing library preparation. One of the common variant calling pipelines available is GATK which suggests best practices for calling variants on RNAseq (<https://software.broadinstitute.org/gatk/best-practices/>). Another variant calling protocol specifically designed for RNAseq is Opossum (Oikkonen and Lise, 2017), which can be used with haplotype-based callers such as Platypus and GATK haplotypeCaller. This software maintains precision and improves the sensitivity of SNP calling compared to the GATK best practice pipeline. RVboost (Wang, Davila, *et al.*, 2014) was developed using the method of

variant prioritization, using a so-called boosting method that uses a set of high-confidence variants to set a model of good quality variants. All RNA variants are then prioritized and called based on this model. It outperforms Variant Quality Score Recalibration (VQSR) from the Genome Analysis Tool Kit (GATK) and the RNA-Seq variant calling pipeline SNPiR (Piskol *et al.*, 2013). RVboost can identify false variants introduced by random hexamer priming during library preparation.

*Whole genome resequencing:* Whole-genome resequencing requires a well assembled reference and is more expensive than RAD-seq or targeted sequencing, especially for species with long and complex genomes. Some methods do not actually require any reference sequence to call SNPs from raw reads, like kSNP2 (Gardner and Hall, 2013) or DiscoSNP (Uricaru *et al.*, 2015). However, this limits the main interest of this approach, since mapping back on a reference has the potential to provide a complete overview of structural and coding variation. It also allows the use of powerful methods to track signatures of selection (see below). Pooled sequencing (Futschik and Schlötterer, 2010) can be an option to reduce costs, but generally restricts analyses to methods focusing on allele frequencies. Since individual information is not available, variation in Linkage Disequilibrium across individuals (LD) cannot be exploited. Shallow sequencing (1-5X per individual) may be a way to partly overpass this last issue for a similar cost (Buerkle and Gompert, 2013), but should not be used for methods requiring phasing and unbiased individual genotypes.

Shallow shotgun sequencing also allows retrieving complete plastomes, due to the representation bias of mitochondrial or chloroplast sequences. Plastome sequences can provide insightful information into the evolutionary history of populations or species, and recent work has successfully used shallow sequencing to reconstruct mitochondrial or chloroplast sequences in plants (Malé *et al.*, 2014), animals (Hahn *et al.*, 2013) or old and

altered museum samples (Besnard *et al.*, 2016). Methods such as MITObim (Hahn *et al.*, 2013) provide an automated and relatively user-friendly way to reconstitute plastome sequences, which can then be analyzed as a single non-recombining marker for phylogeny or population genetics.

## Population structure and data description

### **Population structure and diversity**

Description of the data is essential to assess the proportion of loci displaying a consistent pattern, and characterize how genetic diversity is partitioned within species. Genetic diversity and its genome-wide variance are directly impacted by variation in many factors including effective population sizes, population structure, inbreeding, migration, and recombination rates. Their characterization must be performed prior to any analysis to get insights into the forces and constraints acting on populations.

A key aspect when describing a new dataset is the assessment of relatedness between individuals or localities. Neglecting population structure can dramatically bias demographic inference, especially when gene flow is not accounted for or panmixia is assumed (Chikhi *et al.*, 2010; Heller *et al.*, 2013). It also biases the detection of loci under selection (e.g. Nielsen *et al.*, 2007). Cryptic population structure is typically a confounding effect in studies of phenotype-genotype association studies, when a given feature or trait is disproportionally found in a population or a set of related individuals (Balding, 2006). Fortunately, the abundance of SNP data produced by typical genomic studies is often enough to thoroughly assess relatedness between individuals.

268

269 Many tools currently exist to infer population structure (Table 1, Figure 2). An elegant and  
 270 efficient class of methods relies on using multivariate approaches such as principal component  
 271 analysis (PCA) to infer relatedness between individuals and populations without *a priori*  
 272 knowledge. Since these methods do not have underlying assumptions based on population  
 273 genetics, they are suitable for analyzing species displaying polyploidy or mixed-ploidy  
 274 (Dufresne *et al.*, 2014). A detailed review of these methods has been already performed  
 275 (Jombart *et al.*, 2009) and an exhaustive list of their applications is beyond the scope of this  
 276 review. These approaches have been especially useful to study the consistency between  
 277 geographical and genetic structure in human populations of Europe (Novembre *et al.*, 2008).  
 278 They were also recently applied to RAD-sequenced populations of a freshwater crustacean  
 279 (*Daphnia magna*). Procrustes rotation (Novembre *et al.*, 2008) was used to match  
 280 geographical coordinates with PCA axes, showing how isolation by distance has shaped  
 281 genetic structure (Fields *et al.* 2015).

282

283 Methods for estimating the relatedness of individuals are suited to studies relying on pedigree  
 284 information, or if there are reasons to suspect that familial relationships can play a major role  
 285 in shaping genetic structure of the population(s) considered. When each individual in a study  
 286 is sampled from a different location or environment, estimating relatedness also provides a  
 287 way to assess the genetic distance between individuals. Genetic distance can then be  
 288 compared with geographical or ecological distance. For example, in a recent study using more  
 289 than 1000 *Arabidopsis thaliana* genomes, estimates of relatedness have allowed the  
 290 identification of putatively relictual populations that may have persisted in Europe since the  
 291 last Ice Age (Alonso-Blanco *et al.*, 2016).

292

293 Approaches such as Structure (Pritchard *et al.*, 2000) and fastSTRUCTURE (Raj *et al.*, 2014)  
 294 have been widely used to determine hierarchical population structure and admixed  
 295 populations by grouping individuals in clusters. The optimal number of clusters (K) can then  
 296 be determined based on likelihood, although examining population structure for a range of K  
 297 can allow substructure to be better identified. The main interest of these approaches is that  
 298 they provide a measure of coancestry coefficients, which are the proportions of an individual  
 299 genome originating from multiple ancestral gene pools. Such information is more difficult to  
 300 retrieve with approaches such as PCA. There have been criticisms however about whether  
 301 ambiguous assignment could be actually interpreted as a signal of admixture, and detailed  
 302 inference requires thorough model testing and estimating the goodness of fit of a model with  
 303 admixture (see Falush *et al.*, 2016).

304

### 305 **Heterogenous patterns of divergence between species along their genomes**

306 Advantageous alleles can migrate from one population to another, resist introgression from  
 307 other populations, reach fixation and erase diversity around them. This is one scenario leading  
 308 to heterogenous patterns of divergence along the genome, the so-called islands of divergence  
 309 (Wolf and Ellegren, 2016). Alternative scenarios leading to similar patterns were recently  
 310 highlighted (Cruickshank and Hahn, 2014). Understanding the origin of genomic regions  
 311 under selection highlights the evolutionary history of adaptive alleles (e.g. Abi-Rached *et al.*,  
 312 2011) and contributes to our understanding of the origin and maintenance of reproductive  
 313 isolation. Studies focusing on hybrid zones and introgression have provided inspiring  
 314 examples (Hedrick, 2013), as demonstrated by recent work focusing on patterns of  
 315 heterogenous gene flow in *Mytilus* mussels (Roux *et al.*, 2014), localized introgression and

inversions at a color locus in *Heliconius* butterflies (The Heliconius Genome Consortium *et al.*, 2012) and adaptive introgression of anticoagulant resistance alleles in mice (Song *et al.*, 2011). Descriptive statistics computed along genomes provide valuable information in this context. One may for example plot the distribution of a differentiation measure such as  $F_{ST}$  (Weir and Cockerham, 1984) between populations, mean linkage disequilibrium or nucleotide diversity. Such an approach has been used in *Ficedula* flycatchers, which uncovered clear genomic islands of divergence and the higher differentiation on sexual chromosomes due to ongoing reproductive isolation (Ellegren *et al.*, 2012). Other approaches, such as chromosome painting (Table 1), extend PCA and Structure-like methods by incorporating information about the relative order of markers in the genome, allowing identification of regions for which ancestry differs from the rest of the genome.

### **Heterogeneous structure in space: landscape genomics**

Landscape (as well as seascape and lakescape) genetics has widely contributed to our understanding of how ecological and geographical variation affects species history and adaptation (Manel and Holderegger, 2013). Of central importance in this field is the identification of how populations are connected and how organisms move in the landscape matrix. Environmental heterogeneity has a strong impact on how genetic diversity is shaped by migration success between populations, for example after a range expansion (Wegmann *et al.*, 2006). A spatially explicit perspective provides context to understand the evolution of locally adapted genes. Moreover, identifying how and where populations (or closely related species, see Roux *et al.* 2016) hybridize is crucial when it comes to characterizing colonization trajectories, tension zones and secondary contacts (Gay *et al.*, 2008; Bierne *et al.*, 2011).

340

341 Some methods can explicitly use spatial information to inform clustering, allowing improved  
 342 consideration of the effect of landscape heterogeneity on selection against migrants and drift.  
 343 This spatial perspective can be useful to visualize the location and shape of hybrid zones  
 344 (Guedj and Guillot, 2011). Landscape genetics has valuable application in management and  
 345 conservation, where it is useful to identify the relevant evolutionary significant units  
 346 displaying spatial and ecological divergence. Furthermore, researchers are often interested in  
 347 testing the impact of ecological variation on genetic structure. Mantel tests have been popular  
 348 to investigate relationships between ecological variables and genetic differentiation while  
 349 accounting for geographical distances. However, these tests are biased by spatial  
 350 autocorrelation, assume linear dependence between variables, and do not allow testing the  
 351 relative contribution of each variable (Legendre and Fortin, 2010; Guillot and Rousset, 2013).  
 352 Methods such as BEDASSLE (Bradburd *et al.*, 2013) can be used to complement these  
 353 approaches, and identify which combination of geographical and ecological distance limits  
 354 dispersal. However, disentangling these effects has proved to be complex and a deeper  
 355 analysis of genes more strongly impacted by either geography or ecology may be more  
 356 informative when it comes to the proximate causes of reduced dispersion and differentiation,  
 357 such as biased dispersal (Edelaar and Bolnick, 2012; Bolnick and Otto, 2013) or selection  
 358 against migrants (Hendry, 2004). Landscape genomics now extends its focus to adaptive  
 359 genetic variation, and benefits from new methods targeting signatures of selection (Figure 2  
 360 and below).

361

362 Population history

## Phylogeny

Phylogenetics has a long history that is linked to the broader topic of systematics (Moritz & Hillis 1996; Baum & Smith 2013). Since their inception in the 1980s, molecular phylogenetic methods have been used to address a wide range of problems at different taxonomic scales, including intraspecific population history. Recent advances in molecular phylogenetic methods, and the employment of different types of NGS data is well beyond the scope of this review (see e.g. Moriarty Lemmon & Lemmon 2013; Cruaud et al. 2014; Wen et al. 2015). Rather we focus on the use of phylogeny within the context of studies of intra-specific population history and selection. In this respect, both Maximum Likelihood and Bayesian approaches have become popular to investigate evolutionary relationships between individuals from different populations, even when divergence is very recent (e.g. Wagner *et al.*, 2013). These methods are implemented in softwares such as RAxML (Stamatakis, 2014) and BEAST2 (Drummond and Rambaut, 2007). Ultimately, all molecular phylogenies reconstruct the genealogy of the genes with which they have been constructed. Therefore, a basic assumption when using them to infer lineage history at any taxonomic level (populations, species, and higher taxonomic units) is that the gene tree is representative of lineage history. This assumption is likely to be particularly weak at the population level, since the influences of gene flow, selection, and incomplete lineage sorting are strong at this scale, and may cause gene trees to deviate from population history. Nonetheless, such phylogenies can provide a useful starting point for inferences that are complemented with other methods.

When using genome-wide data at the population level, methods specifically dedicated to reconstructing multiple species coalescent models (MSC) such as \*BEAST (STAR-BEAST) should be preferred over concatenation (Edwards *et al.* 2016), since they allow discordance between species trees and individual gene trees to be identified. Note that these methods can

be strongly biased when it comes to estimate divergence times and effective population sizes (Leaché *et al.*, 2014). The impact of gene flow and recombination on phylogenetic methods is however an alley of research that will allow better integration between phylogeny and population genetics (Edwards *et al.*, 2016). Such integration is particularly needed for species and populations that are in the “grey zone of speciation” (Roux *et al.*, 2016). Recent advances in MSC methods handling extremely short, non-recombining fragments (see Chou *et al.*, 2015 for a comparison) are promising, especially for datasets such as those produced by GBS.

While useful to infer topologies, caution is advised when using branches lengths obtained from SNP-only datasets, e.g. to calculate divergence times between different groups or species (Leaché *et al.*, 2015). For this purpose, it might therefore be easier to extract from the data both variant and invariant sites at several genes or RAD contigs, and analyze the whole sequences in a software like BEAST2. Network methods implemented in SplitsTree (Huson and Bryant, 2006), make less assumptions and account for potentially conflicting signals due to high gene flow. Unfortunately, such methods remain mostly descriptive.

## **Approximate Bayesian Computation**

Phylogenetic methods tend to be slow for large datasets, and generally do not attempt to account for many effects that are crucial in population genetic interpretation, such as gene flow and recent demographic events within species. A more suitable framework for microevolutionary studies relies on coalescence theory. Population geneticists first developed coalescent theory as a way of modeling the genealogy of alleles from a sample of a large population. Going backward in time, alleles merge (coalesce) in a stochastic way until reaching their most recent common ancestor (Kingman, 1982). Obtaining demographic estimates (e.g. time in years) for parameters usually requires that mutation rate and generation

time be known or at least reasonably well estimated, for example from closely-related species with similar life history.

Computationally fast approaches include Approximate Bayesian Computation (ABC), which compares the empirical data with a set of simulated data produced by coalescent simulations under scenarios predefined by the user (Table 2). By measuring the distance between carefully chosen summary statistics describing each simulation with those from the observed dataset, it is possible to infer which scenario explains the data the best. More information on how to perform ABC analyses are described by Csilléry *et al.* (2010). The main advantage of ABC is that it allows handling any type of marker and arbitrarily complex models, contrary to methods like IMA where the model is predefined. However, using summary statistics leads to the loss of potentially useful information (Robert *et al.*, 2011).

#### **Likelihood methods based on the allele frequency spectrum (AFS)**

Recently, new likelihood methods based on the AFS emerged to facilitate and speed up the analysis of large SNP datasets. Different patterns of gene flow and demographic events all shape the AFS in specific ways (e.g. alleles are likely to occur at more similar frequencies if divergence is recent or if populations are highly connected). These approaches quickly estimate parameters using composite likelihoods, and do not explicitly take into account correlations induced by LD between physically linked markers (but see ABLE, Table 2). This might limit power to detect recent demographic events (e.g. migration, Jenkins *et al.*, 2012). Including SNPs that are physically close together should not strongly bias parameter estimation. However, such an approach prevents direct comparisons of likelihoods from different models. Therefore, physically independent SNPs should be used to consider

composite likelihoods as quasi likelihoods for model comparison (Excoffier *et al.*, 2013).  
Note that the AFS can also be used as a set of summary statistics for ABC inference. Using  
allele frequencies estimated from pooled datasets is also feasible, as illustrated by a recent  
study on hybridization in *Populus* species where AFS was estimated from pooled whole  
genome resequencing data (Christe *et al.*, 2016).

The number of mutations found in a given length of DNA sequence directly depends on the  
mutation rate. One drawback when using SNP data without considering monomorphic sites is  
that the mutation rate per generation can not be used to convert parameters into demographic  
estimates (Excoffier *et al.*, 2013). Another possibility consists of calibrating parameter  
estimates by including a fixed parameter in the analysis, such as population size or divergence  
time. An issue specific to SNP arrays is ascertainment bias, which is the systematic deviation  
of allele frequencies from theoretical expectations due to the choice of individuals used at the  
step of SNP discovery. For example, if SNPs found in one population are the only ones  
genotyped in another population, a whole set of markers polymorphic in the second  
population but not in the first will be missed, biasing the AFS (Lachance and Tishkoff, 2013).

Reaching a high level of precision when estimating demographic parameters can be  
challenging when information is lacking about the evolutionary history of the species  
considered. However, even when such information is lacking it is possible to compare the  
likelihoods of different demographic scenarios, a procedure that has been successfully applied  
to many species to shed light on the process of speciation (Roux *et al.*, 2016).

## Methods using whole-genome resequencing

Recently, methods have been developed to infer variation in population sizes with time using the whole genome of just one diploid individual. This began with the Pairwise Sequentially Markovian Coalescent (PSMC, Li and Durbin, 2011), and extensions have been made to this model to allow for several genomes. Such methods have the advantage of requiring only a few individuals, and no *a priori* knowledge of population history. One general drawback, however, is that they are limited to rather simple scenarios, and do not handle more than two populations as yet (but see diCal2, Table 2). While powerful, they are sensitive to confounding factors such as population structure (Orozco-terWengel, 2016) that lead to false signatures of expansion or bottleneck. They also do not allow extremely recent demographic events to be investigated, since the coalescence of two alleles from a single individual in the recent past (a few tens to hundreds generations) is infrequent. Moreover, most of these methods require the data to be phased (but see SMC++, Table 2), for example with fastPhase (Scheet and Stephens, 2006) or BEAGLE (Browning and Browning, 2011). In addition, phasing errors can lead to strong biases in parameters estimates for recent times (Terhorst *et al.*, 2016). An extension of these methods takes into account population structure and aims to identify the number of islands contributing to a single genome, assuming it is sampled from a Wright n-island meta-population (Mazet *et al.*, 2015). Such developments should improve the amount of information retrieved from only a few genomes. However, natural populations are structured and connected in complex ways, which can bias demographic inferences, even for popular markers such as mitochondrial sequences (Heller *et al.*, 2013).

Methods based on tracts of identity-by-descent (IBD, Palamara and Pe'er, 2013) constitute an interesting alternative for more complex model testing when whole genome or densely genotyped datasets are available in large number. Such methods allow recent demographic events to be inferred with relative precision. They are used to predict the length of haplotypes

shared by two individuals that are inherited from a common ancestor without recombination. However, IBD detection requires large cohorts and accurate phasing, and therefore application of these methods has been largely restricted to human populations so far (Browning and Browning, 2011; Palamara and Pe'er, 2013). Another approach has used tracts of identity-by-state to perform demographic inference over a range of time-scales (IBS, Harris and Nielsen, 2013). IBS tracts are directly observable since they are simply the intervals between pairwise differences in an alignment of sequences and do not require any assumption about coancestry to be defined. The method predicts the length distribution of IBS tracts for pairs of haplotypes under a range of demographic parameters. These predicted spectra are then compared to empirical data under a likelihood framework, as with methods based on the AFS.

There is currently a tradeoff to be made between methods allowing for arbitrarily complex models that are defined *a priori* by the user (e.g. ABC), and methods that allow population history to be inferred agnostically (e.g. PSMC). While the first category of methods are typically the highest performers at inferring complex population history from a moderate number of markers, it is currently only the second category of methods that are able to make use of the full information provided by whole genome data. Using both methods can therefore help in accurately retrieving the evolutionary history of a given species. For example, a recent study on maize demographic and selective history used both  $\partial a \partial i$  and Markovian Coalescent methods to characterize the bottleneck and expansion associated with domestication (Beissinger *et al.*, 2016).

Screening for selection and association

**Selection and its impact on sequence variation**

While demographic forces such as drift and migration will affect the whole genome, selection is expected to be specific to particular portions of the genome, and therefore yield discrepancies with genome-wide polymorphism (Lewontin and Krakauer, 1973). Selection affects allele frequencies and polymorphism in predictable ways at the scale of single populations (Charlesworth, 2006; Charlesworth and Charlesworth, 2010). Several statistics summarize them, such as  $\pi$ , the nucleotide diversity (Nei and Li, 1979), Tajima's D (Tajima, 1989), and Fay and Wu's H (Fay and Wu, 2000). Using a combination of these statistics allows targets of selection to be identified with greater precision, and minimizes the confounding effects of demography (Nielsen *et al.*, 2005). This approach has been used to develop composite tests, such as the composite likelihood ratio (CLR) test (Nielsen *et al.*, 2005) that aim to detect recent selective sweeps.

## **Methods based on population subdivision**

When an allele is under positive selection in a population, its frequency tends to rise to fixation, unless gene flow from other populations or strong drift prevents this from happening (Charlesworth *et al.*, 1997). It is therefore possible to contrast patterns of differentiation between populations adapted to their local environment to detect loci under divergent selection (e.g. displaying a high  $F_{st}$ ). However, it is essential to control for population structure, as it may strongly affect the distribution of differentiation measures and produce high rates of false positives. First attempts to take into account population structure and variation in gene flow included FDIST2 (Beaumont and Nichols, 1996). This method models populations as islands and is aimed at detecting loci under selection by contrasting heterozygosity to  $F_{st}$  between populations. More sophisticated methods are now available (Table 3), dedicated to the detection of outliers in large genomic datasets. Most of them correct for relatedness across samples, and can test association between allele frequencies and

environmental features (see the extensive review by François *et al.*, 2015). These methods are particularly well suited for the study of RAD-sequencing data, for which allele frequencies are often the only information available in the absence of any reference genome.

Detecting association between environment and allele frequencies does not necessarily imply a role for local adaptation. For example, in the case of secondary contact, intrinsic genetic incompatibilities can lead to the emergence of tension zones that may shift until they reach an environmental barrier where they can be trapped (Bierne *et al.*, 2011). Characterizing population history is required to draw conclusions about the possible involvement of a genomic region in adaptation to environment. The sampling strategy must take into account the particular historical and demographic features of the species investigated to gain power (Nielsen *et al.*, 2007). The sequencing strategy must also be carefully considered to control for spatial autocorrelation of genotypes due to isolation by distance and shared demographic history.

## **Genome-wide association**

The methods described above focus on allele frequencies at the population scale, but do not test association with traits that vary between individuals within populations (e.g. resistance to a pathogen, symbiotic association, individual size or flowering time). For this task, methods performing Genome-wide association analysis (GWAS) are better suited. The recent development of multivariate methods such as PCAdapt (Duforet-Frebourg *et al.*, 2016) also allow loci putatively under selection to be identified in admixed or continuous populations without requiring information about individual phenotype.

Uncovering the genetic basis of complex, polygenic traits remains challenging, even in model species (Pritchard and Di Rienzo, 2010; Rockman, 2012). It may be unavoidable as a first step to focus only on traits that are under relatively simple genetic determinism. This can, however, lead to the overrepresentation of loci of major phenotypic effect, a fact that should be acknowledged when discussing the impact of selection on genome variation. The fact that loci of major effect are the easiest to target does not imply that they are necessarily the main substrate of selection (Rockman, 2012). Association methods may help targeting variants undergoing soft sweeps, weak selection or those involved in polygenic control of traits (Pritchard *et al.*, 2010). In such cases, signatures of selection may be subtle and sometimes difficult to retrieve from allele frequency data.

## **Detecting selection with methods focusing on LD**

LD is increased and diversity is decreased near a selected allele, especially after recent selection. A class of methods are aimed at targeting those regions that display an excess of long homozygous haplotypes, such as the extended haplotype homozygosity (EHH) test (Sabeti *et al.*, 2002). It is also possible to compare haplotype extension across populations, with the Cross Population Extended Haplotype Homozygosity test (XP-EHH (McCarroll *et al.*, 2007)) or Rsb (the standardized ratio of EHH at a given SNP site (Tang *et al.*, 2007)). Individuals included in the analysis should be as distantly related as possible to improve precision and avoid an excess of false positives. These methods require data to be phased in order to reconstruct haplotypes. Statistics dedicated to the detection of selection on standing variation or on multiple alleles (so called soft sweeps) are also available, like the nSL statistics (Ferrer-Admetlla *et al.*, 2014) in selscan or the H2/H1 statistics (Garud *et al.*, 2015), although further studies are still needed to understand to what extent hard and soft sweeps can

actually be distinguished (Schridder *et al.*, 2015), as well as their relative importance (Messer and Petrov, 2013; Jensen, 2014).

Even hard selective sweeps can be challenging to detect with LD-based statistics (Jensen, 2014). It is advisable to combine several approaches to improve confidence when pinpointing candidate genes for selection. Methods based on LD alone can sometimes miss the actual variants under selection due to the impact of recombination on local polymorphism that can mimic soft or ongoing hard sweeps (Schridder *et al.*, 2015).

All LD-based approaches are more powerful with a relatively high density of markers, such as the ones obtained from whole-genome sequencing, SNP-arrays or high-density RAD-seq, and benefit from using statistics focusing on polymorphism and allele sharing. In a recent study of local adaptation in sticklebacks (Roesti *et al.*, 2015), these statistics have been used on dense RAD-sequencing data to look for recent selection at loci displaying high differentiation ( $F_{ST}$ ). This approach has allowed new candidate loci to be pinpointed, and has confirmed the involvement of those implicated previously (e.g. the *Ectodysplasin* gene). In addition, the identification of large regions displaying high divergence and LD has revealed the importance of large-scale structural variation in shaping genome structure, such as inversions (Roesti *et al.*, 2015).

## **Detecting and characterizing selection with the coalescent**

If a candidate locus or genomic region has been identified, it is possible to use coalescent simulations to evaluate the strength of selection and estimate the age of alleles. A software such as msms (Ewing and Hermisson, 2010), which is also available in PopGenome, can then

be used. However, this requires that population history is known in order to control for other phenomena such as population structure and gene flow. An advantage of full coalescent methods is that they provide a relatively complete picture of the history of individual loci. This can be achieved by modeling coalescence and recombination, and considering variation in mutation rate. However, such methods have long been computationally intensive, and thus difficult to apply to whole genomes. Fortunately, recent computational improvements make their application to whole genomes feasible. A good example is ARGWeaver (Rasmussen *et al.*, 2014), which has allowed candidate genes for long-term balancing selection to be recovered from human data. This method uses ancestral recombination graphs to model the genealogy of each non-recombining block in the genome. Ancestral recombination graphs (ARG) are a generalization of the coalescent and describe the sequence of genealogies along a sample of recombining sequence. Genealogies are estimated for each non-recombining block, and recombination between adjacent blocks is described by breaking the branch leading to the recombining haplotype and allowing it to re-coalesce to the rest of the tree. This succession of local trees joined by recombination events provides a full description of the genealogical history of the data and is therefore a promising approach to characterize positive, purifying or balancing selection while taking into account variation in recombination and mutation rate.

## Identifying variants of functional interest

Characterizing the number of synonymous versus non-synonymous mutations is another approach to detect whether a specific gene is undergoing purifying or positive selection. However, this approach requires an annotated genome. An excess of non-synonymous mutations can signal positive or balancing selection, or a relaxation of selective constraints on a given gene. Annotation of mutations can be done with SNPdat (Doran and Creevey, 2013), or directly in PopGenome, which can also perform tests of selection such as the MK test at the

genome scale (McDonald and Kreitman, 1991). Another popular test of selection is the comparison of non-synonymous and synonymous mutations between orthologs from different species, and can be performed in packages such as PAML (Yang, 2007). To recover information about the putative function of a gene or a genomic region, it may be useful to perform a genome ontology (GO) enrichment analysis, using tools such as BLAST2GO (Conesa *et al.*, 2005).

While suggestive, genome scans for selection and association in natural populations cannot be considered as conclusive evidence for the function of a given gene, and need to be combined with functional evidence (Vitti *et al.*, 2013). Such evidence can sometimes be provided by variation in the expression of a candidate gene highlighted by RNA-sequencing data. More often, developmental studies are required, a step that is not always possible for non-model organisms. Pinpointing the exact genetic mutation leading to a change in phenotype is challenging even when combining several tests for selection, and requires whole-genome sequencing data to obtain a near-exhaustive list of mutations. It has been proposed to combine QTL analyses with population genomics to facilitate identification of candidate loci (Stinchcombe and Hoekstra, 2008). Essentially, controlled crosses allow genomic regions associated with a selected phenotype to be identified, while the study of variation in natural populations facilitates the fine-mapping of selected variants in natural populations. However, this requires that the species of interest can be raised in a laboratory or greenhouse, which is unpractical for many research teams. An alternative is the study of candidate genes, for which an extensive description of functional variation is available. For example, in a recent study on passerines (bananaquits), GBS data have been used to obtain a neutral distribution to which patterns of substitution and differentiation were compared at candidate genes for color variation (Uy *et al.*, 2016). Another study on color polymorphism in *Peromyscus* mice used a combination of field experiments, targeted sequencing of candidate genes and neutral regions,

and genome-scans for selection. Tests for association between these data were able to show how selection on many mutations at the same locus drive adaptive phenotypic divergence (Linnen *et al.*, 2013).

The combination of tests aimed at different signatures of selection can allow the size of candidate regions to be reduced. For example, combining results from environmental association mapping and genomic scans for selection allows the identification of candidate genes for which a function can be proposed (François *et al.*, 2015). Another common approach relies on the combination of different tests targeting signatures of selection, typically those using the allele frequency spectrum and those using haplotype length. A test of this type has been proposed in human genetics (Grossman *et al.*, 2013), and is called the composite of multiple signals (CMS) test. Nevertheless, signatures of selection can be elusive, and obtaining an exhaustive list of genes under positive selection is unlikely. Further advances will require that methods targeting selection be able to better take into account epistatic interaction and weak selection.

## Suggestions and perspectives

### **Estimating selection and demography jointly along a heterogeneous genome**

As stated by Lewontin and Krakauer in 1973, "while natural selection will operate differently for each locus and each allele at a locus, the effect of breeding structure is uniform over all loci and all alleles". Since then, traditional studies on selection have mostly considered that demographic processes act on all loci in the same way across a genome, and that positive selection is mostly rare. This traditional approach has thus tended to disconnect the study of selection from the study of demography (Li *et al.*, 2012).

679

680 However, this assumption may be incorrect, and a joint understanding of demography and  
681 selection is crucial from this perspective (Figure 3). For example, the large effective  
682 population sizes of *Drosophila* have been hypothesized to facilitate a widespread effect of  
683 selection across the genome (Sattath *et al.*, 2011; discussion in Li *et al.*, 2012), making both  
684 demographic inference and detection of outliers difficult. Other confounding factors include  
685 variation in recombination and mutation rates, and background selection (Ewing and Jensen,  
686 2016), which are difficult to assess with precision in non-model species. Moreover, it has  
687 been shown in the last few years that loci involved in reproductive isolation are often also  
688 involved in local adaptation. This, combined with variation in introgression rates along the  
689 genome, can bias inference about selection and demography (Bierne *et al.*, 2011; Roux *et al.*,  
690 2014). Genomic regions with low recombination rates can lead to reduced polymorphism, and  
691 be mistaken for signatures of purifying selection.

692

693 These issues can only be addressed by going beyond categorization between methods  
694 assigned to either the study of selection or demography, and using the results obtained by one  
695 method to inform the other. Such an approach was taken by Tine *et al.* 2014 in investigating  
696 the two different lineages of the European Sea Bass, using a RAD-sequencing approach. Tine  
697 *et al.* took into account variation in recombination rate along the genome to interpret  
698 signatures of reduced polymorphism as possibly being the result of selection, low  
699 recombination, or a combination of the two (Tine *et al.*, 2014). Since differentiation along the  
700 genome seemed to reveal islands resisting gene flow, they could fit a model incorporating  
701 variation in introgression rates. This provided improved fit to the data and suggested that  
702 islands of differentiation are most likely to be due to locally reduced gene flow after  
703 secondary contact. This example illustrates how a combination of descriptive statistics and

coalescent analyses can be used to retrieve information from genomic data about both selection and demography.

Most methods do not actually estimate demography and selection jointly, but rather rely on a process where neutral expectations are first drawn from a set of SNPs presumed to be neutral (e.g. intergenic SNPs), followed by a step where the likelihood of a marker being under selection is evaluated. Methods such as BAYPASS or PCAdapt (Table 3) are convenient in both describing population structure and providing preliminary insights into the proportion of loci that do not follow neutral expectations. If this proportion is high, it would suggest recent introgression or an excess of markers displaying high LD (e.g. due to large inversions). However, when this proportion is not too high, outliers can be removed to avoid bias (Schridder *et al.*, 2016) and the remaining loci used to compare neutral models and estimate demographic parameters (e.g. using an ABC framework). These estimated parameters can then be used to simulate sequences or independent SNPs and generate a neutral expectation. Loci that are more likely to be neutral can be used to further calibrate tests for selection such as FLK or BAYPASS (Lotterhos and Whitlock, 2014).

Some recent methods are especially relevant to study both demography and selection at once, while taking into account variation in recombination and mutation rates. For whole-genome data, methods reconstructing ancestral recombination graphs (such as ARGWeaver) have high potential. They allow genealogies to be retrieved along the genome as well as the timing of coalescence events. Such information is ultimately useful for making inferences regarding selection and migration. Recently this method was used in human paleogenomics to quantitatively characterize introgression between modern humans, Neandertals and

Denisovans using only a few whole genomes (Kuhlwilm *et al.*, 2016). However, the approach has a high computing and sequencing cost, and is therefore not suitable for studies requiring sampling of many individuals.

Caution must prevail when attempting to apply sophisticated methods to disentangle selection and demography. In a recent review, Cruickshank & Hahn suggest that IMA2, which is commonly used to estimate migration rates, is not able to reliably distinguish between loci resisting gene flow, and those under selection in the absence of gene flow (Cruickshank and Hahn, 2014). In the specific case they highlight (*Oryctolagus cuniculus* rabbits, Sousa *et al.*, 2013), a descriptive statistic that should have captured introgression signatures ( $d_{xy}$ ) did not reveal any evidence for differential gene flow between loci categorized by IMA2. This controversy illustrates that basic description of the data is needed prior using more sophisticated methods. Note however that Cruickshank & Hahn did not address the case of secondary contact, and other methods such as ABC may better detect interruption in gene flow (Sup. Text in Roux *et al.*, 2016).

To sum up, the field of population genomics is now moving towards both better integrating the demographic framework in inferences of selection, and, conversely, taking into account selection when reconstructing demographic history. The joint inference of loci under selection and quantification of demographic dynamics is of crucial importance in fields such as landscape genomics or the study of ongoing speciation. It should provide insights into the role of selection, recombination and gene flow in promoting or impairing local adaptation to new habitats. The growing availability of genome-wide data for non-model species is therefore promising, but requires caution and high stringency in our interpretation of observed patterns.

With the decreasing cost of sequencing, it has been suggested that NGS will rapidly broaden our perspective on complex evolutionary processes, from biogeography (Lexer *et al.*, 2013) to the genetic basis of traits (Hohenlohe, 2014) and the maintenance of polymorphisms (Hedrick, 2006). While genome heterogeneity in migration, mutation and recombination rates do not necessarily make impossible any conclusion about evolutionary dynamics, they have the potential to blur inferences. The study of DNA sequence variation is already challenging in its own right. Nonetheless, in order to be informative about processes such as selection and demography it should ultimately be combined with other disciplines such as ecology and functional analyses (Habel *et al.*, 2015). This can be done for example by assessing the function of selected genes, the consistency of demographic history with information retrieved from the fossil record or geological history, and the broader integration of population genomics with other fields and methods whenever possible, such as niche modeling, common garden experiments or the study of macro-evolutionary patterns of selection and diversification.

## **Beyond SNPs: studying structural variation, transposable elements and epigenetic modifications**

Most genome-scale studies of selection and demography have so far focused on SNPs, since they are relatively easy to detect with current technology and their mutation mechanism produces mostly biallelic alleles, making them easier to use for statistical tests. However, many other heritable genetic alterations can affect genomes, including insertions of transposable elements (Villanueva-Cañas *et al.*, 2017), epigenetics modifications such as methylation (Danchin *et al.*, 2011), duplications, inversions, deletions and translocations (Iskow *et al.*, 2012). One of the main issues with this type of variation is that their diversity and their impact on the genome can make them difficult to detect in a systematic way (Iskow

*et al.*, 2012), especially for species for which only a draft genome is available. It is however possible to use variation in such genetic alternations to study selection, for example by using differentiation statistics, association to environment or extension of haplotypes. Combining information about variant position and SNP variation in flanking regions is also a powerful way to detect variants under selection (Villanueva-Cañas *et al.*, 2017) as highlighted by a recent study of transposable element insertions in *Drosophila* (Kofler *et al.*, 2012). Recent work also shows that classical summary statistics such as Tajima's D can be adapted to non-SNP datasets, such as methylations (Wang and Fan, 2014).

Sets of neutral SNPs can be used to control for demography and relatedness between samples when inferring selection. For example, this type of approach has recently been adopted in studies of selection on methylation patterns. In a recent Molecular Ecology issue (Verhoeven *et al.*, 2016), a study using bisulfite precipitation in Valley Oak trees (Gugger *et al.* 2016) was able to place methylated variants associated to climatic variables near to genes known to be involved in response to environment. Another study could show a stronger pattern of Isolation by Distance for methylation-sensitive AFLPs than for regular AFLPs and microsatellites, suggesting a stronger impact of environment on methylation patterns than expected under neutrality (Herrera *et al.*, 2016).

Another potential issue with this type of variation is that there is currently a lack of tools able to simulate their models of mutation, complicating any comparison with neutral models built from SNPs. This is particularly true for transposable elements, for which the assumption of mutation-drift equilibrium is challenging, making comparisons of their allele frequency spectrum with neutral SNPs potentially difficult. For example, a recent burst of transposition can lead to an excess of low frequency elements and recent insertions compared to the expectation under equilibrium, even if transposable elements are not under purifying selection

(Bergman and Bensasson, 2007; Blumenstiel *et al.*, 2014). More generally, neutral models would benefit from new ways to model the appearance of genomic variation through time for non-SNP data. This would provide even more conservative assessments of negative and positive selection.

## Acknowledgements

The University of Basel and New York University Abu Dhabi have supported YB's research in this area. We want to thank two anonymous reviewers, Stephane Boissinot, Joris Bertrand and Anne Roulin for their insightful comments on previous versions of the manuscript.

## References

- Abi-Rached L, Jobin M, Kulkarni S, McWhinnie A, Dalva K, Gragert L, *et al.* (2011). The shaping of modern human immune systems by multiregional admixture with archaic humans. *Science* **334**: 89–95.
- Abzhanov A, Extavour CG, Groover A, Hodges SA, Hoekstra HE, Kramer EM, *et al.* (2008). Are we there yet? Tracking the development of new model systems. *Trends Genet* **24**: 353–60.
- Albrechtsen A, Nielsen FC, Nielsen R (2010). Ascertainment biases in SNP chips affect measures of population divergence. *Mol Biol Evol* **27**: 2534–2547.
- Alexander DH, Novembre J (2009). Fast Model-Based Estimation of Ancestry in Unrelated Individuals. *Genome Res*: 1655–1664.
- Alonso-Blanco C, Andrade J, Becker C, Bemm F, Bergelson J, Borgwardt KMM, *et al.* (2016). 1,135 Genomes Reveal the Global Pattern of Polymorphism in *Arabidopsis thaliana*. *Cell* **166**: 481–491.
- Arnold B, Corbett-Detig RB, Hartl D, Bomblies K (2013). RADseq underestimates diversity and introduces genealogical biases due to nonrandom haplotype sampling. *Mol Ecol* **22**:

828 3179–90.

829 Aulchenko YS, Ripke S, Isaacs A, van Duijn CM (2007). GenABEL: An R library for  
830 genome-wide association analysis. *Bioinformatics* **23**: 1294–1296.

831 Axelsson E, Ratnakumar A, Arendt M-L, Maqbool K, Webster MT, Perloski M, *et al.* (2013).  
832 The genomic signature of dog domestication reveals adaptation to a starch-rich diet.  
833 *Nature* **495**: 360–4.

834 Baird NA, Etter PD, Atwood TS, Currey MC, Shiver AL, Lewis ZA, *et al.* (2008). Rapid SNP  
835 discovery and genetic mapping using sequenced RAD markers. *PLoS One* **3**: e3376.

836 Balding DJ (2006). A tutorial on statistical methods for population association studies. *Nat*  
837 *Rev Genet* **7**: 781–91.

838 Baran Y, Pasaniuc B, Sankararaman S, Torgerson DG, Gignoux C, Eng C, *et al.* (2012). Fast  
839 and accurate inference of local ancestry in Latino populations. *Bioinformatics* **28**: 1359–  
840 1367.

841 Beaumont MA, Balding DJ (2004). Identifying adaptive genetic divergence among  
842 populations from genome scans. *Mol Ecol* **13**: 969–980.

843 Beaumont MA, Nichols RA (1996). Evaluating loci for use in the genetic analysis of  
844 population structure. *Proc R Soc London Biol Sci*: 1619–1626.

845 Beeravolu CR, Hickerson MJ, Frantz LAF, Lohse K (2016). Approximate Likelihood  
846 Inference of Complex Population Histories and Recombination from Multiple Genomes.  
847 *bioRxiv*: 1–31.

848 Beerli P, Palczewski M (2010). Unified framework to evaluate panmixia and migration  
849 direction among multiple sampling locations. *Genetics* **185**: 313–26.

850 Beissinger TM, Wang L, Crosby K, Durvasula A, Hufford MB, Ross-Ibarra J (2016). Recent  
851 demography drives changes in linked selection across the maize genome. *Nat Plants* **2**:  
852 16084.

853 Bergman CM, Bensasson D (2007). Recent LTR retrotransposon insertion contrasts with  
854 waves of non-LTR insertion since speciation in *Drosophila melanogaster*. *Proc Natl*  
855 *Acad Sci U S A* **104**: 11340–11345.

856 Besnard G, Bertrand JAM, Delahaie B, Bourgeois YXC, Lhuillier E, Thébaud C (2016).

- Valuing museum specimens: high-throughput DNA sequencing on historical collections of New Guinea crowned pigeons (Goura). *Biol J Linn Soc* **117**: 71–82.
- Bierne N, Welch J, Loire E, Bonhomme F, David P (2011). The coupling hypothesis: why genome scans may fail to map local adaptation genes. *Mol Ecol* **20**: 2044–72.
- Blumenstiel JP, Chen X, He M, Bergman CM (2014). An age-of-allele test of neutrality for transposable element insertions. *Genetics* **196**: 523–538.
- Boistard S, Rodriguez W, Jay F, Mona S, Austerlitz F (2016). Inferring Population Size History from Large Samples of Genome-Wide Molecular Data - An Approximate Bayesian Computation Approach. *PLoS Genet*: 858–865.
- Bolnick DI, Otto SP (2013). The magnitude of local adaptation under genotype-dependent dispersal. *Ecol Evol* **3**: 4722–4735.
- Bonhomme M, Chevalet C, Servin B, Boitard S, Abdallah JM, Blott S, *et al.* (2010). Detecting Selection in Population Trees: The Lewontin and Krakauer Test Extended. *Genetics*: 241–262.
- Bouckaert R, Heled J, Kühnert D, Vaughan T, Wu CH, Xie D, *et al.* (2014). BEAST 2: A Software Platform for Bayesian Evolutionary Analysis. *PLoS Comput Biol* **10**: 1–6.
- Bradburd GS, Ralph PL, Coop GM (2013). Disentangling the effects of geographic and ecological isolation on genetic differentiation. *Evolution (N Y)* **67**: 3258–3273.
- Brisbin A, Bryc K, Byrnes J, Zakharia F, Omberg L, Degenhardt J, *et al.* (2012). PCAdmix: Principal Components-Based Assignment of Ancestry along Each Chromosome in Individuals with Admixed Ancestry from Two or More Populations. *Hum Biol* **84**: 343–364.
- Browning BL, Browning SR (2011). A fast, powerful method for detecting identity by descent. *Am J Hum Genet* **88**: 173–182.
- Bryant D, Bouckaert R, Felsenstein J, Rosenberg NA, Roychoudhury A (2012). Inferring species trees directly from biallelic genetic markers: Bypassing gene trees in a full coalescent analysis. *Mol Biol Evol* **29**: 1917–1932.
- Buerkle CA, Gompert Z (2013). Population genomics based on low coverage sequencing: how low should we go? *Mol Ecol* **22**: 3028–35.

886 Cadzow M, Boocock J, Nguyen HT, Wilcox P, Merriman TR, Black MA (2014). A  
887 bioinformatics workflow for detecting signatures of selection in genomic data. *Front*  
888 *Genet* **5**: 1–8.

889 Cariou M, Duret L, Charlat S (2013). Is RAD-seq suitable for phylogenetic inference? An in  
890 silico assessment and optimization. *Ecol Evol* **3**: 846–852.

891 Catchen JM, Amores A, Hohenlohe P, Cresko W, Postlethwait JH (2011). Stacks: building  
892 and genotyping Loci de novo from short-read sequences. *G3 (Bethesda)* **1**: 171–82.

893 Catchen JM, Hohenlohe PA, Bernatchez L, Funk WC, Andrews KR, Allendorf FW (2017).  
894 Unbroken: RADseq remains a powerful tool for understanding the genetics of adaptation  
895 in natural populations. *Mol Ecol Resour*: 362–365.

896 Charlesworth D (2006). Balancing selection and its effects on sequences in nearby genome  
897 regions. *PLoS Genet* **2**: e64.

898 Charlesworth B, Charlesworth D (2010). *Elements of evolutionary genetics*.

899 Charlesworth B, Nordborg M, Charlesworth D (1997). The effects of local selection, balanced  
900 polymorphism and background selection on equilibrium patterns of genetic diversity in  
901 subdivided populations. *Genet Res, Camb* **70**: 155–174.

902 Chifman J, Kubatko L (2014). Quartet inference from SNP data under the coalescent model.  
903 *Bioinformatics* **30**: 3317–3324.

904 Chikhi L, Sousa VC, Luisi P, Goossens B, Beaumont MA (2010). The confounding effects of  
905 population structure, genetic diversity and the sampling scheme on the detection and  
906 quantification of population size changes. *Genetics* **186**: 983–995.

907 Chou J, Gupta A, Yaduvanshi S, Davidson R, Nute M, Mirarab S, *et al.* (2015). A  
908 comparative study of SVDquartets and other coalescent-based species tree estimation  
909 methods. *BMC Genomics* **16**: S2.

910 Christe C, Stolting KN, Paris M, Frayisse C, Bierne N, Lexer C (2016). Adaptive evolution  
911 and segregating load contribute to the genomic landscape of divergence in two tree  
912 species connected by episodic gene flow. *Mol Ecol*.

913 Conesa A, Gotz S, Garcia-Gomez JM, Terol J, Talon M, Robles M (2005). Blast2GO: A  
914 universal tool for annotation, visualization and analysis in functional genomics research.

915 *Bioinformatics* **21**: 3674–3676.

916 Cornuet J-M, Santos F, Beaumont MA, Robert CP, Marin J-M, Balding DJ, *et al.* (2008).  
917 Inferring population history with DIY ABC: a user-friendly approach to approximate  
918 Bayesian computation. *Bioinformatics* **24**: 2713–9.

919 Cruickshank TE, Hahn MW (2014). Reanalysis suggests that genomic islands of speciation  
920 are due to reduced diversity, not reduced gene flow. *Mol Ecol* **23**: 3133–3157.

921 Csilléry K, Blum MGB, Gaggiotti OE, François O (2010). Approximate Bayesian  
922 Computation (ABC) in practice. *Trends Ecol Evol* **25**: 410–8.

923 Csilléry K, François O, Blum MGB (2012). abc: an R package for approximate Bayesian  
924 computation (ABC). *Methods Ecol Evol* **3**: 475–479.

925 Cushman SA (2014). Grand challenges in evolutionary and population genetics: The  
926 importance of integrating epigenetics, genomics, modeling, and experimentation. *Front*  
927 *Genet* **5**: 1–5.

928 Danchin É, Charmantier A, Champagne F a, Mesoudi A, Pujol B, Blanchet S (2011). Beyond  
929 DNA: integrating inclusive inheritance into an extended theory of evolution. *Nat Rev*  
930 *Genet* **12**: 475–86.

931 Danecek P, Auton A, Abecasis G, Albers CA, Banks E, DePristo MA, *et al.* (2011). The  
932 variant call format and VCFtools. *Bioinformatics* **27**: 2156–2158.

933 Davey JW, Hohenlohe PA, Etter PD, Boone JQ, Catchen JM, Blaxter ML (2011). Genome-  
934 wide genetic marker discovery and genotyping using next-generation sequencing. *Nat*  
935 *Rev Genet* **12**: 499–510.

936 Degiorgio M, Huber CD, Hubisz MJ, Hellmann I, Nielsen R (2016). Genetics and population  
937 analysis SWEEPfinder 2: Increased sensitivity, robustness, and flexibility.  
938 *Bioinformatics*.

939 DeGiorgio M, Lohmueller KE, Nielsen R (2014). A model-based approach for identifying  
940 signatures of ancient balancing selection in genetic data. *PLoS Genet* **10**: e1004561.

941 Doran AG, Creevey CJ (2013). Snpdat: easy and rapid annotation of results from de novo snp  
942 discovery projects for model and non-model organisms. *BMC Bioinformatics* **14**: 45.

943 Drummond AJ, Rambaut A (2007). BEAST: Bayesian evolutionary analysis by sampling

944 trees. *BMC Evol Biol* **7**: 214.

945 Duforet-Frebourg N, Luu K, Laval G, Bazin E, Blum MGB (2016). Detecting genomic  
946 signatures of natural selection with principal component analysis: Application to the  
947 1000 genomes data. *Mol Biol Evol* **33**: 1082–1093.

948 Dufresne F, Stift M, Vergilino R, Mable BK (2014). Recent progress and challenges in  
949 population genetics of polyploid organisms: An overview of current state-of-the-art  
950 molecular and statistical tools. *Mol Ecol* **23**: 40–69.

951 Edelaar P, Bolnick DI (2012). Non-random gene flow: an underappreciated force in evolution  
952 and ecology. *Trends Ecol Evol* **27**: 659–65.

953 Edwards S V., Xi Z, Janke A, Faircloth BC, McCormack JE, Glenn TC, *et al.* (2016).  
954 Implementing and testing the multispecies coalescent model: A valuable paradigm for  
955 phylogenomics. *Mol Phylogenet Evol* **94**: 447–462.

956 Ellegren H, Smeds L, Burri R, Olason PI, Backström N, Kawakami T, *et al.* (2012). The  
957 genomic landscape of species divergence in *Ficedula* flycatchers. *Nature* **491**: 756–60.

958 Elshire RJ, Glaubitz JC, Sun Q, Poland JA, Kawamoto K, Buckler ES, *et al.* (2011). A  
959 Robust, Simple Genotyping-by-Sequencing (GBS) Approach for High Diversity Species.  
960 *PLoS One* **6**: e19379.

961 Ewing G, Hermisson J (2010). MSMS: A coalescent simulation program including  
962 recombination, demographic structure and selection at a single locus. *Bioinformatics* **26**:  
963 2064–2065.

964 Ewing GB, Jensen JD (2016). The consequences of not accounting for background selection  
965 in demographic inference. *Mol Ecol* **25**: 135–141.

966 Excoffier L, Dupanloup I, Huerta-Sanchez E, Sousa VC, Foll M (2013). Robust Demographic  
967 Inference from Genomic and SNP Data. *PLoS Genet* **9**.

968 Excoffier L, Foll M (2011). Fastsimcoal: a Continuous-Time Coalescent Simulator of  
969 Genomic Diversity Under Arbitrarily Complex Evolutionary Scenarios. *Bioinformatics*  
970 **27**: 1332–4.

971 Excoffier L, Heckel G (2006). Computer programs for population genetics data analysis: a  
972 survival guide. *Nat Rev Genet* **7**: 745–58.

973 Excoffier L, Lischer HEL (2010). Arlequin suite ver 3.5: a new series of programs to perform  
974 population genetics analyses under Linux and Windows. *Mol Ecol Resour* **10**: 564–7.

975 Falush D, Dorp L van, Lawson D (2016). A tutorial on how (not) to over-interpret  
976 STRUCTURE/ADMIXTURE bar plots. *bioRxiv*: 66431.

977 Fay JC, Wu CI (2000). Hitchhiking under positive Darwinian selection. *Genetics* **155**: 1405–  
978 13.

979 Ferrer-Admetlla A, Liang M, Korneliussen T, Nielsen R (2014). On detecting incomplete soft  
980 or hard selective sweeps using haplotype structure. *Mol Biol Evol* **31**: 1275–1291.

981 Ferretti L, Ramos-Onsins SE, Pérez-Enciso M (2013). Population genomics from pool  
982 sequencing. *Mol Ecol* **22**: 5561–5576.

983 Foll M, Gaggiotti O (2008). A genome-scan method to identify selected loci appropriate for  
984 both dominant and codominant markers: a Bayesian perspective. *Genetics* **180**: 977–93.

985 da Fonseca RR, Albrechtsen A, Themudo GE, Ramos-Madriral J, Sibbesen JA, Maretty L, *et*  
986 *al.* (2016). Next-generation biology: Sequencing and data analysis approaches for non-  
987 model organisms. *Mar Genomics* **30**: 1–11.

988 François O, Martins H, Caye K, Schoville SD (2015). Controlling False Discoveries in  
989 Genome Scans for Selection. *Mol Ecol* **55**: in press.

990 Fraser DJ, Bernatchez L (2001). Adaptive evolutionary conservation: Towards a unified  
991 concept for defining conservation units. *Mol Ecol* **10**: 2741–2752.

992 Frichot E, Mathieu F, Trouillon T, Bouchard G, François O (2014). Fast and efficient  
993 estimation of individual ancestry coefficients. *Genetics* **196**: 973–983.

994 Frichot E, Schoville SD, Bouchard G, François O (2013). Testing for associations between  
995 loci and environmental gradients using latent factor mixed models. *Mol Biol Evol* **30**:  
996 1687–1699.

997 Futschik A, Schlötterer C (2010). The next generation of molecular markers from massively  
998 parallel sequencing of pooled DNA samples. *Genetics* **186**: 207–18.

999 Gardner SN, Hall BG (2013). When whole-genome alignments just won't work: KSNP v2  
1000 software for alignment-free SNP discovery and phylogenetics of hundreds of microbial  
1001 genomes. *PLoS One* **8**.

1002 Garrigan D (2013). POPBAM: Tools for evolutionary analysis of short read sequence  
1003 alignments. *Evol Bioinforma* **2013**: 343–353.

1004 Garud NR, Messer PW, Buzbas EO, Petrov DA (2015). Recent Selective Sweeps in North  
1005 American *Drosophila melanogaster* Show Signatures of Soft Sweeps. *PLoS Genet* **11**: 1–  
1006 32.

1007 Gautier M (2015). Genome-Wide Scan for Adaptive Divergence and Association with  
1008 Population-Specific Covariates. *Genetics* **201**: 1555–1579.

1009 Gautier M, Laloë D, Moazami-Goudarzi K (2010). Insights into the genetic history of French  
1010 cattle from dense SNP data on 47 worldwide breeds. *PLoS One* **5**: 1–11.

1011 Gautier M, Vitalis R (2012). Rehh An R package to detect footprints of selection in genome-  
1012 wide SNP data from haplotype structure. *Bioinformatics* **28**: 1176–1177.

1013 Gautier M, Vitalis R (2013). Inferring population histories using genome-wide allele  
1014 frequency data. *Mol Biol Evol* **30**: 654–668.

1015 Gay L, Crochet P-A, Bell D a, Lenormand T (2008). Comparing clines on molecular and  
1016 phenotypic traits in hybrid zones: a window on tension zone models. *Evolution* **62**:  
1017 2789–806.

1018 Gayral P, Melo-Ferreira J, Glémin S, Bierne N, Carneiro M, Nabholz B, *et al.* (2013).  
1019 Reference-Free Population Genomics from Next-Generation Transcriptome Data and the  
1020 Vertebrate-Invertebrate Gap. *PLoS Genet* **9**.

1021 Glaubitz JC, Casstevens TM, Lu F, Harriman J, Elshire RJ, Sun Q, *et al.* (2014). TASSEL-  
1022 GBS: A high capacity genotyping by sequencing analysis pipeline. *PLoS One* **9**.

1023 Gronau I, Hubisz MJ, Gulko B, Danko CG, Siepel A (2011). Bayesian inference of ancient  
1024 human demography from individual genome sequences. *Nat Genet* **43**: 1031–1034.

1025 Grossman SR, Andersen KG, Shlyakhter I, Tabrizi S, Winnicki S, Yen A, *et al.* (2013).  
1026 Identifying recent adaptations in large-scale genomic data. *Cell* **152**: 703–713.

1027 Grover CE, Salmon A, Wendel JF (2012). Targeted sequence capture as a powerful tool for  
1028 evolutionary analysis. *Am J Bot* **99**: 312–9.

1029 Guedj B, Guillot G (2011). Estimating the location and shape of hybrid zones. *Mol Ecol*  
1030 *Resour* **11**: 1119–1123.

- 1031 Guillot G, Renaud S, Ledevin R, Michaux J, Claude J (2012). A unifying model for the  
1032 analysis of phenotypic, genetic, and geographic data. *Syst Biol* **61**: 897–911.
- 1033 Guillot G, Rousset F (2013). Dismantling the Mantel tests. *Methods Ecol Evol* **4**: 336–344.
- 1034 Guindon S, Dufayard JF, Lefort V, Anisimova M, Hordijk W, Gascuel O (2010). New  
1035 algorithms and methods to estimate maximum-likelihood phylogenies: Assessing the  
1036 performance of PhyML 3.0. *Syst Biol* **59**: 307–321.
- 1037 Günther T, Coop G (2013). Robust identification of local adaptation from allele frequencies.  
1038 *Genetics* **195**: 205–220.
- 1039 Gutenkunst RN, Hernandez RD, Williamson SH, Bustamante CD (2009). Inferring the joint  
1040 demographic history of multiple populations from multidimensional SNP frequency data.  
1041 *PLoS Genet* **5**.
- 1042 Habel J, Zachos F, Dapporto L, Rödder D, Radespiel U, Tellier A, *et al.* (2015). Population  
1043 genetics revisited – towards a multidisciplinary research field. *Biol J Linn Soc* **115**: 1–12.
- 1044 Hahn C, Bachmann L, Chevreux B (2013). Reconstructing mitochondrial genomes directly  
1045 from genomic next-generation sequencing reads - A baiting and iterative mapping  
1046 approach. *Nucleic Acids Res* **41**.
- 1047 Hand BK, Hether TD, Kovach RP, Muhlfeld CC, Amish SJ, Boyer MC, *et al.* (2015).  
1048 Genomics and introgression: Discovery and mapping of thousands of species-diagnostic  
1049 SNPs using RAD sequencing. *Curr Zool* **61**: 146–154.
- 1050 Harris K, Nielsen R (2013). Inferring Demographic History from a Spectrum of Shared  
1051 Haplotype Lengths. *PLoS Genet* **9**.
- 1052 Hedrick PW (2006). Genetic Polymorphism in Heterogeneous Environments: The Age of  
1053 Genomics. *Annu Rev Ecol Evol Syst* **37**: 67–93.
- 1054 Hedrick PW (2013). Adaptive introgression in animals: Examples and comparison to new  
1055 mutation and standing variation as sources of adaptive variation. *Mol Ecol* **22**: 4606–  
1056 4618.
- 1057 Heled J, Drummond AJ (2010). Bayesian Inference of Species Trees from Multilocus Data.  
1058 *Mol Biol Evol* **27**: 570–580.
- 1059 Hellenthal G, Busby GBJ, Band G, Wilson JF, Capelli C, Falush D, *et al.* (2014). A Genetic

1060 Atlas of Human Admixture History. *Science* **343**: 747–751.

1061 Heller R, Chikhi L, Siegmund HR (2013). The Confounding Effect of Population Structure  
1062 on Bayesian Skyline Plot Inferences of Demographic History. *PLoS One* **8**.

1063 Hendry AP (2004). Selection against migrants contributes to the rapid evolution of  
1064 ecologically dependent reproductive isolation. *Evol Ecol Res* **6**: 1219–1236.

1065 Herrera CM, Medrano M, Bazaga P (2016). Comparative spatial genetics and epigenetics of  
1066 plant populations: Heuristic value and a proof of concept. *Mol Ecol* **25**: 1653–1664.

1067 Hey J, Nielsen R (2007). Integration within the Felsenstein equation for improved Markov  
1068 chain Monte Carlo methods in population genetics. *Proc Natl Acad Sci U S A* **104**: 2785–  
1069 90.

1070 Hohenlohe PA (2014). Ecological genomics in full colour. *Mol Ecol* **23**: 5129–31.

1071 Hudson RR (2002). Generating samples under a Wright–Fisher neutral model of genetic  
1072 variation. *Bioinformatics* **18**: 337–338.

1073 Huson DH, Bryant D (2006). Application of phylogenetic networks in evolutionary studies.  
1074 *Mol Biol Evol* **23**: 254–267.

1075 Iskow RC, Gokcumen O, Lee C (2012). Exploring the role of copy number variants in human  
1076 adaptation. *Trends Genet* **28**: 245–257.

1077 Jenkins PA, Song YS, Brem RB (2012). Genealogy-Based Methods for Inference of  
1078 Historical Recombination and Gene Flow and Their Application in *Saccharomyces*  
1079 *cerevisiae*. *PLoS One* **7**.

1080 Jenner RA, Wills MA (2007). The choice of model organisms in evo-devo. *Nat Rev Genet* **8**:  
1081 311–319.

1082 Jensen JD (2014). On the unfounded enthusiasm for soft selective sweeps. *Nat Commun* **5**:  
1083 5281.

1084 Johnston SE, McEwan JC, Pickering NK, Kijas JW, Beraldi D, Pilkington JG, *et al.* (2011).  
1085 Genome-wide association mapping identifies the genetic basis of discrete and  
1086 quantitative variation in sexual weaponry in a wild sheep population. *Mol Ecol* **20**: 2555–  
1087 2566.

1088 Jombart T, Devillard S, Balloux F, Falush D, Stephens M, Pritchard J, *et al.* (2010).

1089 Discriminant analysis of principal components: a new method for the analysis of  
1090 genetically structured populations. *BMC Genet* **11**: 94.

1091 Jombart T, Devillard S, Dufour a-B, Pontier D (2008). Revealing cryptic spatial patterns in  
1092 genetic variability by a new multivariate method. *Heredity (Edinb)* **101**: 92–103.

1093 Jombart T, Pontier D, Dufour A-B (2009). Genetic markers in the playground of multivariate  
1094 analysis. *Heredity (Edinb)* **102**: 330–41.

1095 Jones MR, Good JM (2016). Targeted capture in evolutionary and ecological genomics. *Mol*  
1096 *Ecol* **25**: 185–202.

1097 Jostins L, McVean G (2016). Trinculo: Bayesian and frequentist multinomial logistic  
1098 regression for genome-wide association studies of multi-category phenotypes.  
1099 *Bioinformatics* **32**: 1898–1900.

1100 Kemppainen P, Knight CG, Sarma DK, Hlaing T, Prakash A, Maung Maung YN, *et al.*  
1101 (2015). Linkage disequilibrium network analysis (LDna) gives a global view of  
1102 chromosomal inversions, local adaptation and geographic structure. *Mol Ecol Resour*:  
1103 1031–1045.

1104 Kern AD, Schrider DR (2016). Discoal: flexible coalescent simulations with selection.  
1105 *Bioinformatics* **32**: 3839–3841.

1106 Kingman JFC (1982). The coalescent. *Stoch Process their Appl* **13**: 235–248.

1107 Kofler R, Betancourt AJ, Schlötterer C (2012). Sequencing of pooled DNA samples (Pool-  
1108 Seq) uncovers complex dynamics of transposable element insertions in *Drosophila*  
1109 *melanogaster*. *PLoS Genet* **8**.

1110 Kofler R, Orozco-terWengel P, De Maio N, Pandey RV, Nolte V, Futschik A, *et al.* (2011).  
1111 PoPoolation: a toolbox for population genetic analysis of next generation sequencing  
1112 data from pooled individuals. *PLoS One* **6**: e15925.

1113 Kofler R, Pandey RV, Schlötterer C (2011). PoPoolation2: identifying differentiation between  
1114 populations using sequencing of pooled DNA samples (Pool-Seq). *Bioinformatics* **27**:  
1115 3435–6.

1116 Kolaczowski B, Kern AD, Holloway AK, Begun DJ (2011). Genomic differentiation  
1117 between temperate and tropical Australian populations of *Drosophila melanogaster*.

1118        *Genetics* **187**: 245–60.

1119    Korneliussen TS, Albrechtsen A, Nielsen R (2014). ANGSD: Analysis of Next Generation  
1120        Sequencing Data. *BMC Bioinformatics* **15**: 356.

1121    Kubota S, Iwasaki T, Hanada K, Nagano AJ, Fujiyama A, Toyoda A, *et al.* (2015). A Genome  
1122        Scan for Genes Underlying Microgeographic-Scale Local Adaptation in a Wild  
1123        Arabidopsis Species. *PLoS Genet* **11**: 1–26.

1124    Kuhlwilm M, Gronau I, Hubisz MJ, de Filippo C, Prado-Martinez J, Kircher M, *et al.* (2016).  
1125        Ancient gene flow from early modern humans into Eastern Neanderthals. *Nature* **530**:  
1126        429–433.

1127    Lachance J, Tishkoff SA (2013). SNP ascertainment bias in population genetic analyses: Why  
1128        it is important, and how to correct it. *Bioessays* **35**: 780–786.

1129    Laland KN, Sterelny K, Odling-Smee J, Hoppitt W, Uller T (2011). Cause and effect in  
1130        biology revisited: is Mayr’s proximate-ultimate dichotomy still useful? *Science* **334**:  
1131        1512–6.

1132    Lee T-H, Guo H, Wang X, Kim C, Paterson AH (2014). SNPhylo: a pipeline to construct a  
1133        phylogenetic tree from huge SNP data. *BMC Genomics* **15**: 162.

1134    Legendre P, Fortin MJ (2010). Comparison of the Mantel test and alternative approaches for  
1135        detecting complex multivariate relationships in the spatial analysis of genetic data. *Mol*  
1136        *Ecol Resour* **10**: 831–844.

1137    Legrand D, Tenaillon MI, Matyot P, Gerlach J, Lachaise D, Cariou M-L (2009). Species-wide  
1138        genetic variation and demographic history of *Drosophila sechellia*, a species lacking  
1139        population structure. *Genetics* **182**: 1197–206.

1140    Lewontin RC, Krakauer J (1973). Distribution of gene frequency as a test of the theory of the  
1141        selective neutrality of polymorphisms. *Genetics* **74**: 175–195.

1142    Lexer C, Mangili S, Bossolini E, Forest F, Stölting KN, Pearman PB, *et al.* (2013). ‘Next  
1143        generation’ biogeography: towards understanding the drivers of species diversification  
1144        and persistence (M Carine, Ed.). *J Biogeogr* **40**: 1013–1022.

1145    Li H, Durbin R (2011). Inference of human population history from individual whole-genome  
1146        sequences. *Nature* **475**: 493–496.

1147 Li J, Li H, Jakobsson M, Li S, Sjödin P, Lascoux M (2012). Joint analysis of demography  
1148 and selection in population genetics: Where do we stand and where could we go? *Mol*  
1149 *Ecol* **21**: 28–44.

1150 Linnen CR, Poh Y-P, Peterson BK, Barrett RDH, Larson JG, Jensen JD, *et al.* (2013).  
1151 Adaptive evolution of multiple traits through multiple mutations at a single gene. *Science*  
1152 **339**: 1312–1316.

1153 Lischer HEL, Excoffier L (2012). PGDSpider: An automated data conversion tool for  
1154 connecting population genetics and genomics programs. *Bioinformatics* **28**: 298–299.

1155 Liu L, Yu L (2011). Estimating species trees from unrooted gene trees. *Syst Biol* **60**: 661–667.

1156 Lotterhos KE, Whitlock MC (2014). Evaluation of demographic history and neutral  
1157 parameterization on the performance of FST outlier tests. *Mol Ecol* **23**: 2178–2192.

1158 Lowry DB, Hoban S, Kelley JL, Lotterhos KE, Reed LK, Antolin MF, *et al.* (2016). Breaking  
1159 RAD: An evaluation of the utility of restriction site associated DNA sequencing for  
1160 genome scans of adaptation. *Mol Ecol Resour.*

1161 Lu F, Lipka AE, Glaubitz J, Elshire R, Cherney JH, Casler MD, *et al.* (2013). Switchgrass  
1162 Genomic Diversity, Ploidy, and Evolution: Novel Insights from a Network-Based SNP  
1163 Discovery Protocol. *PLoS Genet* **9**.

1164 Malé PJG, Bardon L, Besnard G, Coissac E, Delsuc F, Engel J, *et al.* (2014). Genome  
1165 skimming by shotgun sequencing helps resolve the phylogeny of a pantropical tree  
1166 family. *Mol Ecol Resour* **14**: 966–975.

1167 Mamanova L, Coffey AJ, Scott CE, Kozarewa I, Turner EH, Kumar A, *et al.* (2010). Target-  
1168 enrichment strategies for next-generation sequencing. *Nat Methods* **7**: 111–118.

1169 Mandoli DF, Olmstead R (2000). The importance of emerging model systems in plant  
1170 biology. *J Plant Growth Regul* **19**: 249–252.

1171 Manel S, Holderegger R (2013). Ten years of landscape genetics. *Trends Ecol Evol* **28**: 614–  
1172 621.

1173 Manichaikul A, Mychaleckyj JC, Rich SS, Daly K, Sale M, Chen W-M (2010). Robust  
1174 relationship inference in genome-wide association studies. *Bioinformatics* **26**: 2867–  
1175 2873.

- 1176 Martin SH, Van Belleghem SM (2016). Exploring evolutionary relationships across the  
1177 genome using topology weighting. *bioRxiv*: 69112.
- 1178 Mazet O, Rodriguez W, Chikhi L (2015). Demographic inference using genetic data from a  
1179 single individual: Separating population size variation from population structure. *Theor*  
1180 *Popul Biol* **104**: 46–58.
- 1181 McCarroll SA, Sabeti PC, Frazer KA, Varilly P, Fry B, Ballinger DG, *et al.* (2007). Genome-  
1182 wide detection and characterization of positive selection in human populations. *Nature*  
1183 **449**: 913–8.
- 1184 McDonald JH, Kreitman M (1991). Adaptive protein evolution at the Adh locus in  
1185 *Drosophila*. *Nature* **351**: 652–4.
- 1186 McVean G (2007). The structure of linkage disequilibrium around a selective sweep. *Genetics*  
1187 **175**: 1395–406.
- 1188 McVean G, Awadalla P, Fearnhead P (2002). A coalescent-based method for detecting and  
1189 estimating recombination from gene sequences. *Genetics* **160**: 1231–1241.
- 1190 Messer PW, Petrov DA (2013). Population genomics of rapid adaptation by soft selective  
1191 sweeps. *Trends Ecol Evol* **28**: 659–669.
- 1192 Mirarab S, Warnow T (2015). ASTRAL-II: Coalescent-based species tree estimation with  
1193 many hundreds of taxa and thousands of genes. *Bioinformatics* **31**: i44–i52.
- 1194 Myers S (2005). A Fine-Scale Map of Recombination Rates and Hotspots Across the Human  
1195 Genome. *Science* **310**: 321–324.
- 1196 Nadeau NJ, Whibley A, Jones RT, Davey JW, Dasmahapatra KK, Baxter SW, *et al.* (2012).  
1197 Genomic islands of divergence in hybridizing *Heliconius* butterflies identified by large-  
1198 scale targeted sequencing. *Philos Trans R Soc Lond B Biol Sci* **367**: 343–53.
- 1199 Nei M, Li WH (1979). Mathematical model for studying genetic variation in terms of  
1200 restriction endonucleases. *Proc Natl Acad Sci U S A* **76**: 5269–73.
- 1201 Nicholls JA, Pennington RT, Koenen EJM, Hughes CE, Hearn J, Bunnefeld L, *et al.* (2015).  
1202 Using targeted enrichment of nuclear genes to increase phylogenetic resolution in the  
1203 neotropical rain forest genus *Inga* (Leguminosae: Mimosoideae). *Front Plant Sci* **6**: 710.
- 1204 Nielsen R, Hellmann I, Hubisz M, Bustamante C, Clark AG (2007). Recent and ongoing

1205 selection in the human genome. *Nat Rev Genet* **8**: 857–868.

1206 Nielsen R, Williamson S, Kim Y, Nielsen R, Williamson S, Kim Y, *et al.* (2005). Genomic  
1207 scans for selective sweeps using SNP data Genomic scans for selective sweeps using  
1208 SNP data. *Genome Res*: 1566–1575.

1209 Novembre J, Johnson T, Bryc K, Kutalik Z, Boyko AR, Auton A, *et al.* (2008). Genes mirror  
1210 geography within Europe. *Nature* **456**: 98–101.

1211 Oikkonen L, Lise S (2017). Making the most of RNA-seq: Pre-processing sequencing data  
1212 with Opossum for reliable SNP variant detection. *Wellcome Open Res* **2**: 6.

1213 Orozco-terWengel P (2016). The devil is in the details: the effect of population structure on  
1214 demographic inference. *Heredity (Edinb)* **116**: 349–350.

1215 Palamara PF, Pe'er I (2013). Inference of historical migration rates via haplotype sharing.  
1216 *Bioinformatics* **29**: 180–188.

1217 Pavlidis P, Laurent S, Stephan W (2010). MsABC: A modification of Hudson's ms to  
1218 facilitate multi-locus ABC analysis. *Mol Ecol Resour* **10**: 723–727.

1219 Peterson BK, Weber JN, Kay EH, Fisher HS, Hoekstra HE (2012). Double digest RADseq: an  
1220 inexpensive method for de novo SNP discovery and genotyping in model and non-model  
1221 species. *PLoS One* **7**: e37135.

1222 Pfeifer B, Wittelsburger U, Ramos-Onsins SE, Lercher MJ (2014). PopGenome: An efficient  
1223 swiss army knife for population genomic analyses in R. *Mol Biol Evol* **31**: 1929–1936.

1224 Pickrell JK, Pritchard JK (2012). Inference of population splits and mixtures from genome-  
1225 wide allele frequency data. *PLoS Genet* **8**: e1002967.

1226 Piskol R, Ramaswami G, Li JB (2013). Reliable identification of genomic variants from  
1227 RNA-seq data. *Am J Hum Genet* **93**: 641–651.

1228 Poelstra JW, Vijay N, Bossu CM, Lantz H, Ryll B, Baglione V, *et al.* (2014). The genomic  
1229 landscape underlying phenotypic integrity in the face of gene flow in crows. *Science* **344**:  
1230 1410–1414.

1231 Price A, Patterson NJ, Plenge RM, Weinblatt ME, Shadick N a, Reich D (2006). Principal  
1232 components analysis corrects for stratification in genome-wide association studies. *Nat*  
1233 *Genet* **38**: 904–9.

1234 Pritchard JK, Pickrell JK, Coop G (2010). The Genetics of Human Adaptation: Hard Sweeps,  
1235 Soft Sweeps, and Polygenic Adaptation. *Curr Biol* **20**: R208–R215.

1236 Pritchard JK, Di Rienzo A (2010). Adaptation – not by sweeps alone. *Nat Rev Genet* **11**: 665–  
1237 667.

1238 Pritchard JK, Stephens M, Donnelly P (2000). Inference of population structure using  
1239 multilocus genotype data. *Genetics* **155**: 945–959.

1240 Purcell S, Neale B, Todd-Brown K, Thomas L, Ferreira MAR, Bender D, *et al.* (2007).  
1241 PLINK: A Tool Set for Whole-Genome Association and Population-Based Linkage  
1242 Analyses. *Am J Hum Genet* **81**: 559–575.

1243 Puritz JB, Matz M V., Toonen RJ, Weber JN, Bolnick DI, Bird CE (2014). Demystifying the  
1244 RAD fad. *Mol Ecol* **23**: 5937–5942.

1245 Raj A, Stephens M, Pritchard JK (2014). FastSTRUCTURE: Variational inference of  
1246 population structure in large SNP data sets. *Genetics* **197**: 573–589.

1247 Rasmussen MD, Hubisz MJ, Gronau I, Siepel A (2014). Genome-Wide Inference of Ancestral  
1248 Recombination Graphs. *PLoS Genet* **10**.

1249 Robert CP, Cornuet J-M, Marin J-M, Pillai NS (2011). Lack of confidence in approximate  
1250 Bayesian computation model choice. *Proc Natl Acad Sci U S A* **108**: 15112–7.

1251 Rockman M V (2012). The QTN program and the alleles that matter for evolution: all that’s  
1252 gold does not glitter. *Evolution (N Y)* **66**: 1–17.

1253 Roesti M, Kueng B, Moser D, Berner D (2015). The genomics of ecological vicariance in  
1254 threespine stickleback fish. *Nat Commun* **6**: 8767.

1255 Roux C, Fraisse C, Castric V, Vekemans X, Pogson GH, Bierne N (2014). Can we continue to  
1256 neglect genomic variation in introgression rates when inferring the history of speciation?  
1257 A case study in a *Mytilus* hybrid zone. *J Evol Biol* **27**: 1662–1675.

1258 Roux C, Fraïsse C, Romiguier J, Anciaux Y, Galtier N, Bierne N (2016). Shedding Light on  
1259 the Grey Zone of Speciation along a Continuum of Genomic Divergence. *PLOS Biol*.

1260 Roux C, Pauwels M, Ruggiero M-V, Charlesworth D, Castric V, Vekemans X (2013). Recent  
1261 and ancient signature of balancing selection around the S-locus in *Arabidopsis halleri*  
1262 and *A. lyrata*. *Mol Biol Evol* **30**: 435–47.

1263 Sabeti PC, Reich DE, Higgins JM, Levine HZP, Richter DJ, Schaffner SF, *et al.* (2002).  
1264 Detecting recent positive selection in the human genome from haplotype structure. **419**.

1265 Sattath S, Elyashiv E, Kolodny O, Rinott Y, Sella G (2011). Pervasive adaptive protein  
1266 evolution apparent in diversity patterns around amino acid substitutions in drosophila  
1267 simulans. *PLoS Genet* **7**.

1268 Scheet P, Stephens M (2006). A fast and flexible statistical model for large-scale population  
1269 genotype data: applications to inferring missing genotypes and haplotypic phase. *Am J*  
1270 *Hum Genet* **78**: 629–44.

1271 Schiffels S, Durbin R (2014). Inferring human population size and separation history from  
1272 multiple genome sequences. *Nat Genet* **46**: 919–25.

1273 Schrider DR, Mendes FK, Hahn MW, Kern AD (2015). Soft shoulders ahead: Spurious  
1274 signatures of soft and partial selective sweeps result from linked hard sweeps. *Genetics*  
1275 **200**: 267–284.

1276 Schrider DR, Shanku AG, Kern AD (2016). Effects of linked selective sweeps on  
1277 demographic inference and model selection. *Genetics* **204**: 1207–1223.

1278 Schubert M, Jónsson H, Chang D, Der Sarkissian C, Ermini L, Ginolhac A, *et al.* (2014).  
1279 Prehistoric genomes reveal the genetic foundation and cost of horse domestication. *Proc*  
1280 *Natl Acad Sci* **111**: 201416991.

1281 Shafer AB a., Wolf JBW, Alves PC, Bergström L, Bruford MW, Brännström I, *et al.* (2015).  
1282 Genomics and the challenging translation into conservation practice. *Trends Ecol Evol*  
1283 **30**: 78–87.

1284 Sheehan S, Harris K, Song YS (2013). Estimating Variable Effective Population Sizes from  
1285 Multiple Genomes: A Sequentially Markov Conditional Sampling Distribution  
1286 Approach. *Genetics* **194**: 647–662.

1287 Song Y, Endepols S, Klemann N, Richter D, Matuschka FR, Shih CH, *et al.* (2011). Adaptive  
1288 introgression of anticoagulant rodent poison resistance by hybridization between old  
1289 world mice. *Curr Biol* **21**: 1296–1301.

1290 Sousa VC, Carneiro M, Ferrand N, Hey J (2013). Identifying loci under selection against gene  
1291 flow in isolation-with-migration models. *Genetics* **194**: 211–233.

1292 Staab PR, Metzler D (2016). Coala: An R framework for coalescent simulation.  
1293 *Bioinformatics* **32**: 1903–1904.

1294 Staab PR, Zhu S, Metzler D, Lunter G (2015). Scrm: Efficiently simulating long sequences  
1295 using the approximated coalescent with recombination. *Bioinformatics* **31**: 1680–1682.

1296 Stamatakis A (2014). RAxML version 8: A tool for phylogenetic analysis and post-analysis of  
1297 large phylogenies. *Bioinformatics* **30**: 1312–1313.

1298 Stinchcombe JR, Hoekstra HE (2008). Combining population genomics and quantitative  
1299 genetics: finding the genes underlying ecologically important traits. *Heredity (Edinb)*  
1300 **100**: 158–170.

1301 Stucki S, Orozco-Terwengel P, Bruford MW, Colli L, Masembe C, Negri R, *et al.* (2016).  
1302 High performance computation of landscape genomic models integrating local indices of  
1303 spatial association. *Mol Ecol Resour*: 1–15.

1304 Szpiech ZA, Hernandez RD (2014). selscan: an efficient multithreaded program to perform  
1305 EHH-based scans for positive selection. *Mol Biol Evol* **31**: 2824–2827.

1306 Tajima F (1989). Statistical method for testing the neutral mutation hypothesis by DNA  
1307 polymorphism. *Genetics* **123**: 585–95.

1308 Takezaki N, Nei M, Tamura K (2010). POPTREE2: Software for constructing population  
1309 trees from allele frequency data and computing other population statistics with windows  
1310 interface. *Mol Biol Evol* **27**: 747–752.

1311 Tang K, Thornton KR, Stoneking M (2007). A new approach for using genome scans to  
1312 detect recent positive selection in the human genome. *PLoS Biol* **5**: 1587–1602.

1313 Terhorst J, Kamm JA, Song YS (2016). Robust and scalable inference of population history  
1314 from hundreds of unphased whole genomes. *Nat Genet* **49**: 303–309.

1315 The Heliconius Genome Consortium, Dasmahapatra KK, Walters JR, Briscoe AD, Davey JW,  
1316 Whibley A, *et al.* (2012). Butterfly genome reveals promiscuous exchange of mimicry  
1317 adaptations among species. *Nature* **487**: 94–98.

1318 Tine M, Kuhl H, Gagnaire P-A, Louro B, Desmarais E, Martins RST, *et al.* (2014). European  
1319 sea bass genome and its variation provide insights into adaptation to euryhalinity and  
1320 speciation. *Nat Commun* **5**: 5770.

1321 Toonen RJ, Puritz JB, Forsman ZH, Whitney JL, Fernandez-Silva I, Andrews KR, *et al.*  
1322 (2013). ezRAD: a simplified method for genomic genotyping in non-model organisms.  
1323 *PeerJ* **1**: e203.

1324 Uricaru R, Rizk G, Lacroix V, Quillery E, Plantard O, Chikhi R, *et al.* (2015). Reference-free  
1325 detection of isolated SNPs. *Nucleic Acids Res* **43**: e11.

1326 Uy JAC, Cooper EA, Cutie S, Concannon MR, Poelstra JW, Moyle RG, *et al.* (2016).  
1327 Mutations in different pigmentation genes are associated with parallel melanism in island  
1328 flycatchers. *Proc R Soc B* **283**: 2115–2118.

1329 Verhoeven KJF, VonHoldt BM, Sork VL (2016). Epigenetics in ecology and evolution: What  
1330 we know and what we need to know. *Mol Ecol* **25**: 1631–1638.

1331 Villanueva-Cañas JL, Rech GE, de Cara MAR, González J (2017). Beyond SNPs: how to  
1332 detect selection on transposable element insertions. *Methods Ecol Evol* **8**: 728–737.

1333 Vitalis R, Gautier M, Dawson KJ, Beaumont MA (2014). Detecting and measuring selection  
1334 from gene frequency data. *Genetics* **196**: 799–817.

1335 Vitti JJ, Grossman SR, Sabeti PC (2013). Detecting Natural Selection in Genomic Data. *Annu*  
1336 *Rev Genet* **47**: 97–120.

1337 Wagner CE, Keller I, Wittwer S, Selz OM, Mwaiko S, Greuter L, *et al.* (2013). Genome-wide  
1338 RAD sequence data provide unprecedented resolution of species boundaries and  
1339 relationships in the Lake Victoria cichlid adaptive radiation. *Mol Ecol* **22**: 787–98.

1340 Wang C, Davila JJ, Baheti S, Bhagwate A V., Wang X, Kocher JPA, *et al.* (2014). RVboost:  
1341 RNA-seq variants prioritization using a boosting method. *Bioinformatics* **30**: 3414–3416.

1342 Wang J, Fan C (2014). A neutrality test for detecting selection on DNA methylation using  
1343 single methylation polymorphism frequency spectrum. *Genome Biol Evol* **7**: 154–171.

1344 Wang M, Huang X, Li R, Xu H, Jin L, He Y (2014). Detecting recent positive selection with  
1345 high accuracy and reliability by conditional coalescent tree. *Mol Biol Evol* **31**: 3068–  
1346 3080.

1347 Wang S, Meyer E, McKay JK, Matz M V (2012). 2b-RAD: a simple and flexible method for  
1348 genome-wide genotyping. *Nat Methods* **9**: 808–810.

1349 Weber JN, Peterson BK, Hoekstra HE (2013). Discrete genetic modules are responsible for

1350 complex burrow evolution in *Peromyscus* mice. *Nature* **493**: 402–5.

1351 Wegmann D, Currat M, Excoffier L (2006). Molecular diversity after a range expansion in  
1352 heterogeneous environments. *Genetics* **174**: 2009–20.

1353 Wegmann D, Leuenberger C, Neuenschwander S, Excoffier L (2010). ABCtoolbox: a  
1354 versatile toolkit for approximate Bayesian computations. *BMC Bioinformatics* **11**: 116.

1355 Weir BS, Cockerham CC (1984). Estimating F-Statistics for the Analysis of Population  
1356 Structure. *Evolution (N Y)* **38**: 1358–1370.

1357 White BJ, Cheng C, Simard F, Costantini C, Besansky NJ (2010). Genetic association of  
1358 physically unlinked islands of genomic divergence in incipient species of *Anopheles*  
1359 *gambiae*. *Mol Ecol* **19**: 925–939.

1360 Wolf JBW, Ellegren H (2016). Making sense of genomic islands of differentiation in light of  
1361 speciation. *Nat Rev Genet* **18**: 87–100.

1362 Yang Z (2007). PAML 4: Phylogenetic analysis by maximum likelihood. *Mol Biol Evol* **24**:  
1363 1586–1591.

1364 Zheng X, Levine D, Shen J, Gogarten SM, Laurie C, Weir BS (2012). A high-performance  
1365 computing toolset for relatedness and principal component analysis of SNP data.  
1366 *Bioinformatics* **28**: 3326–3328.

1367 Zhou X, Stephens M (2012). Genome-wide efficient mixed model analysis for association  
1368 studies. *Nat Genet* **44**: 821–824.

1369

1370

1371

1372

1373

1374

1375

1376

1377

| Software  | Class of method                         | Purpose                                                        | Species                                                            | Issues and warnings                                                                                    | Link                                                                                                                                    | Reference                      |
|-----------|-----------------------------------------|----------------------------------------------------------------|--------------------------------------------------------------------|--------------------------------------------------------------------------------------------------------|-----------------------------------------------------------------------------------------------------------------------------------------|--------------------------------|
| Arlequin  | AMOVA (Analysis of Molecular Variance)  | Characterizing hierarchical population structure               | Arlequin allows for a variety of analyses of diversity (see below) | Requires a priori assignment of individuals to populations, data formatting is required prior analysis | <a href="http://cmpg.unibe.ch/software/arlequin35/Arl35Downloads.html">http://cmpg.unibe.ch/software/arlequin35/Arl35Downloads.html</a> | (Excoffier and Lischer, 2010)  |
| ADMIXTURE | Clustering and characterizing admixture | Grouping individuals in clusters maximizing HW equilibrium and | Maximum Likelihood, claimed to be faster than Structure            | Often slower than its counterparts                                                                     | <a href="https://www.genetics.ucla.edu/software/admixture/index.html">https://www.genetics.ucla.edu/software/admixture/index.html</a>   | (Alexander and Novembre, 2009) |

## Tables

Table 1. Summary of methods dedicated to data description and assessing population structure. Methods highlighted in bold can be combined in a pipeline within the R software.

|                            |                                         | LD between loci                                                                                 |                                                                                                         |                                                                             |                                                                                                                                       |                                   |
|----------------------------|-----------------------------------------|-------------------------------------------------------------------------------------------------|---------------------------------------------------------------------------------------------------------|-----------------------------------------------------------------------------|---------------------------------------------------------------------------------------------------------------------------------------|-----------------------------------|
| FastSTRUCTURE              | Clustering and characterizing admixture | Grouping individuals in clusters maximizing HW equilibrium and LD between loci                  | ~100X faster than Structure                                                                             | Approximate inference of the original Structure model                       | <a href="http://rajanil.github.io/fastStructure/">http://rajanil.github.io/fastStructure/</a>                                         | (Raj <i>et al.</i> , 2014)        |
| FineStructure/Globetrotter | Clustering and characterizing admixture | Chromosome painting, admixture and clustering                                                   | Estimates time since admixture, fast, specific tools for RAD-seq, set of scripts to facilitate analysis | Relies on Structure and fastStructure assumptions. Requires phased data.    | <a href="http://paintmychromosomes.com/">http://paintmychromosomes.com/</a>                                                           | (Hellenthal <i>et al.</i> , 2014) |
| GENELAND                   | Clustering and characterizing admixture | Grouping individuals in spatially consistent clusters maximizing HW equilibrium                 | Takes into account spatial variation, supposed to detect weak structure, framed in R                    | Immigrant alleles are assumed to be found only in new immigrants            | <a href="https://cran.r-project.org/web/packages/Geneland/">https://cran.r-project.org/web/packages/Geneland/</a>                     | (Guillot <i>et al.</i> , 2012)    |
| PCAdmix                    | Clustering and characterizing admixture | Chromosome painting                                                                             | Fast, uses HMM to smooth out windows and limit noise due to low confidence ancestry                     | Requires a priori definition of ancestral populations and phased haplotypes | <a href="https://sites.google.com/site/pcadmix/">https://sites.google.com/site/pcadmix/</a>                                           | (Brisbin <i>et al.</i> , 2012)    |
| sNMF                       | Clustering and characterizing admixture | Grouping individuals in clusters maximizing HW equilibrium and LD between loci                  | Fast (30X than ADMIXTURE)                                                                               | Still slow computation time for large datasets                              | <a href="http://membres-timc.imag.fr/Olivier.Francois/snmf/index.htm">http://membres-timc.imag.fr/Olivier.Francois/snmf/index.htm</a> | (Frichot <i>et al.</i> , 2014)    |
| STRUCTURE                  | Clustering and characterizing admixture | Grouping individuals in clusters maximizing HW equilibrium and LD between loci                  | User friendly interface. Bayesian inference.                                                            | Slow for large datasets. Requires specific input format                     | <a href="http://pritchardlab.stanford.edu/structure.html">http://pritchardlab.stanford.edu/structure.html</a>                         | (Pritchard <i>et al.</i> , 2000)  |
| TREEMIX                    | Clustering and characterizing admixture | Admixture graph, infers most likely admixture events in a tree                                  | Based on allele frequencies and can be used for pooled data.                                            | Requires multiple runs to properly assess the likelihood of each model      | <a href="https://bitbucket.org/nygcresearch/treemix/src">https://bitbucket.org/nygcresearch/treemix/src</a>                           | (Pickrell and Pritchard, 2012)    |
| BEDASSLE                   | Differentiation and MCMC model testing  | Identifies contribution of environment and geographical distance to populations differentiation | Less biased than Mantel tests, provides tools for model testing                                         | Uses population-level data.                                                 | <a href="https://cran.r-project.org/web/packages/BEDASSLE/index.html">https://cran.r-project.org/web/packages/BEDASSLE/index.html</a> | (Bradburd <i>et al.</i> , 2013)   |
| npstat                     | Differentiation/Diversity               | Extracting summary statistics from pooled data                                                  | Explicitly corrects for sampling bias in pooled data. Allows computing tests using an outgroup (MK)     | Mostly limited to summary statistics, but more complete than Popoolation.   | <a href="https://github.com/lucaferretti/npstat">https://github.com/lucaferretti/npstat</a>                                           | (Ferretti <i>et al.</i> , 2013)   |

|                             |                                         |                                                                       |                                                                                                                                                                                          |                                                                                                                       |                                                                                                                                                         |                                                                                        |
|-----------------------------|-----------------------------------------|-----------------------------------------------------------------------|------------------------------------------------------------------------------------------------------------------------------------------------------------------------------------------|-----------------------------------------------------------------------------------------------------------------------|---------------------------------------------------------------------------------------------------------------------------------------------------------|----------------------------------------------------------------------------------------|
| Stacks                      | Differentiation/Diversity/Phylogeny     | Processing RAD-seq data and facilitate their analysis                 | test, Fay and Wu's H) and characterizing coding mutations. Designed for RAD-seq data, variety of output formats for downstream analyses. Allows to retrieve DNA sequences for each locus | NA                                                                                                                    | <a href="http://catchenlab.life.illinois.edu/stacks/">http://catchenlab.life.illinois.edu/stacks/</a>                                                   | (Catchen <i>et al.</i> , 2011)                                                         |
| ANGSD                       | Differentiation/Diversity/Recombination | Computing summary statistics based on AFS and LD along genomes        | Able to process BAM files, built-in procedures for data filtering, admixture analysis                                                                                                    | Mostly limited to summary statistics                                                                                  | <a href="https://github.com/ANGSD/angsd">https://github.com/ANGSD/angsd</a>                                                                             | (Korneliussen <i>et al.</i> , 2014)                                                    |
| Arlequin                    | Differentiation/Diversity/Recombination | Computing summary statistics based on AFS and LD along genomes        | Can output AFS for further analysis in fastsimcoal2                                                                                                                                      | Slower than PopGenome, requires a private format                                                                      | <a href="http://cmpg.unibe.ch/software/arlequin35/Arl35Downloads.html">http://cmpg.unibe.ch/software/arlequin35/Arl35Downloads.html</a>                 | (Excoffier and Lischer, 2010)                                                          |
| POPGenome                   | Differentiation/Diversity/Recombination | Computing summary statistics based on AFS and LD along genomes        | <b>Accepts VCF and GFF/GFT files, efficient and fast. Tests for admixture available (ABBA BABA test). Includes basic coalescence simulations (ms and msms)</b>                           | <b>Mostly limited to summary statistics (but coalescent simulations are possible). No built-in SNP calling module</b> | <a href="http://catchenlab.life.illinois.edu/stacks/">http://catchenlab.life.illinois.edu/stacks/</a>                                                   | (Pfeifer <i>et al.</i> , 2014)                                                         |
| Popoolation2/Popoolation TE | Differentiation/Diversity/Recombination | Extracting summary statistics from pooled data                        | Explicitly corrects for sampling bias in pooled data                                                                                                                                     | Mostly limited to a few summary statistics. A pipeline dedicated to TE detection is also available                    | <a href="https://sourceforge.net/p/popoolation/wiki/Main/">https://sourceforge.net/p/popoolation/wiki/Main/</a>                                         | (Kofler, Orozco-terWengel, <i>et al.</i> , 2011; Kofler, Pandey, <i>et al.</i> , 2011) |
| VCFTOOLS                    | Differentiation/Diversity/Recombination | Computing summary statistics based on AFS and LD along genomes        | Fast. VCFTOOLS can also be used for SNP filtering                                                                                                                                        | Less summary statistics than POPGenome                                                                                | <a href="https://vcftools.github.io/man_latest.html">https://vcftools.github.io/man_latest.html</a>                                                     | (Danecek <i>et al.</i> , 2011)                                                         |
| POPTREE2                    | Genetic differentiation                 | Visualizing a matrix of pairwise differentiation statistics as a tree | Can be used for pooled datasets, several statistics can be used                                                                                                                          | Differentiation measures alone do not necessarily retrieve the actual history of populations                          | <a href="http://www.med.kagawa-u.ac.jp/~genomelb/takezaki/poptree2/index.html">http://www.med.kagawa-u.ac.jp/~genomelb/takezaki/poptree2/index.html</a> | (Takezaki <i>et al.</i> , 2010)                                                        |
| Kimtree                     | Genetic distance                        | Estimating divergence time between populations                        | The method is conditional on a prior topology provided by                                                                                                                                | Times are given in diffusion time scale, and can be converted                                                         | <a href="http://www1.montpellier.inra.fr/CBGP/software/kimtree/index">http://www1.montpellier.inra.fr/CBGP/software/kimtree/index</a>                   | (Gautier and Vitalis, 2013)                                                            |

|                     |                                     |                                                                                    |                                                                                                                                                                                                              |                                                                              |                                                                                                                                                     |                                    |
|---------------------|-------------------------------------|------------------------------------------------------------------------------------|--------------------------------------------------------------------------------------------------------------------------------------------------------------------------------------------------------------|------------------------------------------------------------------------------|-----------------------------------------------------------------------------------------------------------------------------------------------------|------------------------------------|
|                     |                                     | and testing for topologies                                                         | the user. It computes DIC for a given topology, allowing to test for the best one.                                                                                                                           | in demographic times using independent estimates of $N_e$ .                  | html                                                                                                                                                |                                    |
| Eigenstrat/smartpca | Multivariate analysis               | Summarizing variance across loci and visualizing inter-individual genetic distance | Fast. Can use VCF files as an input                                                                                                                                                                          | Requires careful interpretation (Jombard et al. 2009)                        | <a href="https://github.com/DReichLab/ElG/tree/master/EIGENSTRAT">https://github.com/DReichLab/ElG/tree/master/EIGENSTRAT</a>                       | (Price <i>et al.</i> , 2006)       |
| SPRelate            | Multivariate analysis               | Summarizing variance across loci and visualizing inter-individual genetic distance | Fast. Can use VCF files as an input                                                                                                                                                                          | Requires careful interpretation (Jombard et al. 2009)                        | <a href="https://bioconductor.org/packages/release/bioc/html/SNPRelate.html">https://bioconductor.org/packages/release/bioc/html/SNPRelate.html</a> | (Zheng <i>et al.</i> , 2012)       |
| DAPC (adegenet)     | Multivariate analysis/Clustering    | Maximizes divergence between groups identified by PCA                              | Fast. Less sensitive to HWE assumptions. Claims to be more efficient than Structure                                                                                                                          | Requires careful interpretation (Jombard et al. 2009)                        | <a href="http://adegenet.r-forge.r-project.org/">http://adegenet.r-forge.r-project.org/</a>                                                         | (Jombard <i>et al.</i> , 2010)     |
| sPCA (adegenet)     | Multivariate analysis/Clustering    | Spatially explicit model to assess population structure                            | Spatially explicit and able to detect cryptic structure. Fast. Mendelian error checking, testing family structure, highly accurate kinship coefficient, association analysis, population structure inference | Does not take into account HW equilibrium or LD                              | <a href="http://adegenet.r-forge.r-project.org/">http://adegenet.r-forge.r-project.org/</a>                                                         | (Jombard <i>et al.</i> , 2008)     |
| KING                | Pedigree, Identity by descent/state | Estimating inbreeding and relatedness, multivariate analysis                       | LAMP also allows for association and pedigree analyses                                                                                                                                                       | Kinship coefficient also computed in VCFTOOLS                                | <a href="http://people.virginia.edu/~wc9c/KING/Download.htm">http://people.virginia.edu/~wc9c/KING/Download.htm</a>                                 | (Manichaikul <i>et al.</i> , 2010) |
| LAMP                | Pedigree, Identity by descent/state | Chromosome painting, relatedness                                                   | Allows studying identity by descent and by state. PLINK is a multi-purpose tool, facilitating data analysis within the same software                                                                         | Identifies local ancestry in windows (source of noise), requires phased data | <a href="http://lamp.icsi.berkeley.edu/lamp/">http://lamp.icsi.berkeley.edu/lamp/</a>                                                               | (Baran <i>et al.</i> , 2012)       |
| PLINK               | Pedigree, Identity by descent/state | Estimating inbreeding and relatedness                                              | Computes unadjusted Aik and kinship coefficient                                                                                                                                                              | NA                                                                           | <a href="http://pngu.mgh.harvard.edu/~purcell/plink/">http://pngu.mgh.harvard.edu/~purcell/plink/</a>                                               | (Purcell <i>et al.</i> , 2007)     |
| VCFTOOLS            | Pedigree, Identity by descent/state | Estimating inbreeding and relatedness                                              | Coalescence-based. Suitable for short loci (e.g. RAD-seq and                                                                                                                                                 | More reliable under high incomplete lineage sorting that                     | <a href="https://vcftools.github.io/man_latest.html">https://vcftools.github.io/man_latest.html</a>                                                 | (Danecek <i>et al.</i> , 2011)     |
| ASTRAL-2            | Phylogeny                           | Builds species trees using short non-recombining                                   |                                                                                                                                                                                                              |                                                                              | <a href="https://github.com/smirarab/ASTRAL">https://github.com/smirarab/ASTRAL</a>                                                                 | (Mirarab and Warnow, 2015)         |

|                   |                                      | sequences                                                         | GBS)                                                                                                                                                                                                         | SVDQuartets and NJst<br>(Chou <i>et al.</i> 2015)                                                                                                           |                                                                                                                                       |                                                              |
|-------------------|--------------------------------------|-------------------------------------------------------------------|--------------------------------------------------------------------------------------------------------------------------------------------------------------------------------------------------------------|-------------------------------------------------------------------------------------------------------------------------------------------------------------|---------------------------------------------------------------------------------------------------------------------------------------|--------------------------------------------------------------|
| BEAST2            | Phylogeny                            | Network reconstruction and phylogenetic relationships             | User friendly. Can be used to track changes in effective population sizes (Bayesian Skyline Plots). Possible to estimate divergence times                                                                    | Slow for large datasets. Requires sequence data that can be produced by , e.g., Stacks for RAD-seq data                                                     | <a href="http://beast2.org/">http://beast2.org/</a>                                                                                   | (Drummond and Rambaut, 2007; Bouckaert <i>et al.</i> , 2014) |
| NJst (in phybase) | Phylogeny                            | <b>Builds species trees using short non-recombining sequences</b> | <b>Coalescence-based. Suitable for short loci (e.g. RAD-seq and GBS)</b><br>Maximum Likelihood inference of phylogenetic relationships. An online version is available                                       | <b>See ASTRAL-2 and Chou <i>et al.</i> 2015</b>                                                                                                             | <a href="https://code.google.com/archive/p/phybase/downloads">https://code.google.com/archive/p/phybase/downloads</a>                 | (Liu and Yu, 2011)                                           |
| PhyML             | Phylogeny                            | Phylogenetic relationships                                        | Maximum Likelihood inference of phylogenetic relationships                                                                                                                                                   | Should be used on complex of species or divergent populations with little migration                                                                         | <a href="http://www.atgc-montpellier.fr/phyml/binaries.php">http://www.atgc-montpellier.fr/phyml/binaries.php</a>                     | (Guindon <i>et al.</i> , 2010)                               |
| RAXML             | Phylogeny                            | Network reconstruction and phylogenetic relationships             | Maximum Likelihood inference of phylogenetic relationships                                                                                                                                                   | Should be used on complex of species or divergent populations with little migration<br>Remains slow for medium to large datasets (>1,000SNPs)               | <a href="http://sco.h-its.org/exelixis/web/software/raxml/index.html">http://sco.h-its.org/exelixis/web/software/raxml/index.html</a> | (Stamatakis, 2014)                                           |
| SNAPP             | Phylogeny                            | Phylogenetic relationships                                        | Handles SNP data                                                                                                                                                                                             |                                                                                                                                                             | <a href="http://beast2.org/snapp/">http://beast2.org/snapp/</a>                                                                       | (Bryant <i>et al.</i> , 2012)                                |
| SNPhylo           | Phylogeny                            | Network reconstruction and phylogenetic relationships             | Complete pipeline from SNP filtering to tree reconstruction                                                                                                                                                  | Should be used on complex of species or divergent populations with little migration                                                                         | <a href="http://chibba.pgml.uga.edu/snphylo/">http://chibba.pgml.uga.edu/snphylo/</a>                                                 | (Lee <i>et al.</i> , 2014)                                   |
| SVDQuartets       | Phylogeny                            | Builds species trees using short non-recombining sequences        | Coalescence-based. Suitable for short loci (e.g. RAD-seq and GBS)<br>Outputs a species tree instead of concatenated gene tree. Allows for testing consistency between phylogenetic signals at different loci | See ASTRAL-2 and Chou <i>et al.</i> 2015<br><br>Slow for large datasets. Requires sequence data. Not suited for situations where gene flow/admixture occurs | <a href="http://www.stat.osu.edu/~kubatko/software/SVDquartets/">http://www.stat.osu.edu/~kubatko/software/SVDquartets/</a>           | (Chifman and Kubatko, 2014)                                  |
| *BEAST            | Phylogeny and species tree inference | Divergence time estimation and phylogenetic relationships         |                                                                                                                                                                                                              |                                                                                                                                                             | <a href="http://beast2.org/">http://beast2.org/</a>                                                                                   | (Heled and Drummond, 2010)                                   |

|                |                            |                                                                                                  |                                                                                                                                                                                                 |                                                                                                                                                                                                                                                         |                                                                                                                                                                                                                                                   |                                         |
|----------------|----------------------------|--------------------------------------------------------------------------------------------------|-------------------------------------------------------------------------------------------------------------------------------------------------------------------------------------------------|---------------------------------------------------------------------------------------------------------------------------------------------------------------------------------------------------------------------------------------------------------|---------------------------------------------------------------------------------------------------------------------------------------------------------------------------------------------------------------------------------------------------|-----------------------------------------|
| Splitstree     | Phylogeny/Network          | Network reconstruction and phylogenetic relationships                                            | User friendly interface, proposes a variety of methods for networks reconstruction<br>Handles unphased and missing data, underlying model can be used for organisms such as viruses or bacteria | Mostly descriptive                                                                                                                                                                                                                                      | <a href="http://www.splitstree.org/">http://www.splitstree.org/</a>                                                                                                                                                                               | (Huson and Bryant, 2006)                |
| LDHat          | Recombination              | Estimating variation in recombination rates along a genome                                       | Specifically designed for detecting recombination hotspots                                                                                                                                      | Limited to 300 sequences, private format, model for recombination hotspots based on human data                                                                                                                                                          | <a href="http://ldhat.sourceforge.net/">http://ldhat.sourceforge.net/</a>                                                                                                                                                                         | (McVean <i>et al.</i> , 2002)           |
| LDHot          | Recombination              | Identifying recombination hotspots                                                               |                                                                                                                                                                                                 | Requires data to be phased, working with LDHat                                                                                                                                                                                                          | <a href="https://github.com/auton1/LDhot">https://github.com/auton1/LDhot</a>                                                                                                                                                                     | (Myers, 2005)                           |
| TWISST         | Topology weighting         | Chromosome painting, clustering and branching between populations                                | Retrieves the most likely coalescence pattern between several taxa along the genome. Can be seen as an extension of the ABBA/BABA test                                                          | Needs a priori grouping of individuals into taxa. Requires at least 4 taxa. Impractical for more than 6 taxa. Windows size must include enough SNPs to retrieve the correct topology but at the risk that regions with different histories are included | <a href="https://github.com/simonhmartin/twisst">https://github.com/simonhmartin/twisst</a>                                                                                                                                                       | (Martin and Van Belleghem, 2016)        |
| BAYPASS/Bayenv | Variance/covariance matrix | Building a population covariance matrix across population allele frequencies, similar to TREEMIX | Can handle pooled data                                                                                                                                                                          | Matrices are mostly designed to provide a neutral model for assessing selection, but can be used to infer population structure                                                                                                                          | <a href="http://www1.montpellier.inra.fr/CBGP/software/baypass/">http://www1.montpellier.inra.fr/CBGP/software/baypass/</a> ; <a href="https://bitbucket.org/tguenther/bayenv2/public/src">https://bitbucket.org/tguenther/bayenv2/public/src</a> | (Günther and Coop, 2013; Gautier, 2015) |

| Software | Class of method | Purpose                                                                          | Species                                                                    | Issues and warnings                                                                 | Link                                                                                                                        | Reference                       |
|----------|-----------------|----------------------------------------------------------------------------------|----------------------------------------------------------------------------|-------------------------------------------------------------------------------------|-----------------------------------------------------------------------------------------------------------------------------|---------------------------------|
| abc      | ABC             | Performs all steps for model-checking and parameters estimation for ABC analyses | Informative vignette, allows graphical representation, complete and robust | Does not perform coalescent simulations (but can be used in combination with coala) | <a href="https://cran.r-project.org/web/packages/abc/index.html">https://cran.r-project.org/web/packages/abc/index.html</a> | (Csilléry <i>et al.</i> , 2012) |

Table 2. Summary of methods for demographic inference, simulations and scenarios comparisons. Methods available in R are highlighted in bold.

|              |                                            |                                                                                        |                                                                                                                                                                                                                                                                                                                                             |                                                                                                                                                     |                                                                                                                                     |                                  |
|--------------|--------------------------------------------|----------------------------------------------------------------------------------------|---------------------------------------------------------------------------------------------------------------------------------------------------------------------------------------------------------------------------------------------------------------------------------------------------------------------------------------------|-----------------------------------------------------------------------------------------------------------------------------------------------------|-------------------------------------------------------------------------------------------------------------------------------------|----------------------------------|
| ABCToolbox   | ABC                                        | Complete ABC analysis, from simulations to model checking and parameters estimation    | Modular, facilitates the computation of summary statistics                                                                                                                                                                                                                                                                                  | Current version is Beta (15/01/2016)                                                                                                                | <a href="https://bitbucket.org/phaentu/abctoolbox-public/">https://bitbucket.org/phaentu/abctoolbox-public/</a>                     | (Wegmann <i>et al.</i> , 2010)   |
| DIYABC       | ABC                                        | Complete ABC analysis, from simulations to model checking and parameters estimation    | User-friendly                                                                                                                                                                                                                                                                                                                               | Does not allow to model continuous gene flow                                                                                                        | <a href="http://www1.montpellier.inra.fr/CBGP/diyabc/">http://www1.montpellier.inra.fr/CBGP/diyabc/</a>                             | (Cornuet <i>et al.</i> , 2008)   |
| PopSizeABC   | ABC                                        | Inferring change in $N_e$ using whole-genome data                                      | Supposed to better assess recent events. Uses a set of summary statistics for the AFS and LD between markers. Handles multiple individuals                                                                                                                                                                                                  | Approximate bayesian approaches do not retrieve the whole information                                                                               | <a href="https://forge-dga.jouy.inra.fr/projects/popsizabc/">https://forge-dga.jouy.inra.fr/projects/popsizabc/</a>                 | (Boistard <i>et al.</i> , 2016)  |
| coala        | ABC/coalescent simulations                 | Combining coalescent simulators within a single framework                              | Facilitates the building of scenarios and computes summary statistics for simulations<br>Performs coalescent simulations, parameter estimation and model testing using a fast likelihood method. Can handle arbitrarily complex scenarios for any type of marker<br>Provides quantitative estimates for TMRCA and topologies at each locus. | Includes so far ms, msms and scrn                                                                                                                   | <a href="https://cran.r-project.org/web/packages/coala/index.html">https://cran.r-project.org/web/packages/coala/index.html</a>     | (Staab and Metzler, 2016)        |
| fastsimcoal2 | ABC/Likelihood                             | Model comparison and parameters estimation                                             | Model comparison and parameters estimation<br>Can handle arbitrarily complex scenarios for any type of marker<br>Provides quantitative estimates for TMRCA and topologies at each locus.                                                                                                                                                    | Summary statistics need to be calculated through Arlequin, slowing down their computation                                                           | <a href="http://cmpg.unibe.ch/software/fastsimcoal2/">http://cmpg.unibe.ch/software/fastsimcoal2/</a>                               | (Excoffier <i>et al.</i> , 2013) |
| ARGWeaver    | Ancestral Recombination Graphs/coalescence | Retracing the whole process of recombination and coalescence along a genome            | Estimates effective population size. Provides tools to extract summary statistics for the topologies retrieved.                                                                                                                                                                                                                             | High computing cost. Requires phased whole-genome data.                                                                                             | <a href="https://github.com/mdrasmus/argweaver">https://github.com/mdrasmus/argweaver</a>                                           | (Rasmussen <i>et al.</i> , 2014) |
| G-PhoCS      | Bayesian                                   | Estimating population divergence and migration parameters using a coalescent framework | Bayesian + MCMC, handles ancient samples                                                                                                                                                                                                                                                                                                    | Parameters scaled by mutation rate, no admixture                                                                                                    | <a href="http://compugen.cshl.edu/GPhoCS/">http://compugen.cshl.edu/GPhoCS/</a>                                                     | (Gronau <i>et al.</i> , 2011)    |
| IMa2         | Bayesian                                   | Inferring parameters from an isolation with migration model                            | Fully bayesian approach, can perform joint estimates of parameters in L-mode and test for nested models                                                                                                                                                                                                                                     | IM model is the only one available. Discrete admixture cannot be tested. Long computation times. Recent splits lead to overestimate migration rates | <a href="https://bio.cst.temple.edu/~hey/software/software.htm#IMa2">https://bio.cst.temple.edu/~hey/software/software.htm#IMa2</a> | (Hey and Nielsen, 2007)          |

|                 |                                    |                                                              |                                                                                                                                              |                                                                                                                                                                |                                                                                                                         |                                                                          |
|-----------------|------------------------------------|--------------------------------------------------------------|----------------------------------------------------------------------------------------------------------------------------------------------|----------------------------------------------------------------------------------------------------------------------------------------------------------------|-------------------------------------------------------------------------------------------------------------------------|--------------------------------------------------------------------------|
| Migrate-n       | Bayesian                           | Inferring migration rates                                    | Both ML and bayesian methods can be used to estimate parameters                                                                              | Only estimates population sizes and migration rates. Not suited for large datasets. Private input format                                                       | <a href="http://popgen.sc.fsu.edu/Migrate/Migrate-n.html">http://popgen.sc.fsu.edu/Migrate/Migrate-n.html</a>           | (Beerli and Palczewski, 2010)                                            |
| ABLE            | Coalescence/Composite Likelihood   | Model comparison and parameters estimation                   | Uses both allele frequency spectrum and linkage disequilibrium within blocks of a pre-specified size. Handles whole-genome data and RAD-seq. | Relies on ms syntax. Determining the most informative size for blocks requires performing pilot runs.                                                          | <a href="https://github.com/cham/post/ABLE">https://github.com/cham/post/ABLE</a>                                       | (Beeravolu <i>et al.</i> , 2016))                                        |
| fastsimcoal2    | coalescent simulations             | Building any arbitrary scenario using a coalescent framework | Any arbitrary scenario can be implemented. Handles SNP, microsatellites and sequence data.                                                   | Does not handle selection. Slower than ms with no recombination, much faster with recombination (see manual)                                                   | <a href="http://cmpg.unibe.ch/software/fastsimcoal2/">http://cmpg.unibe.ch/software/fastsimcoal2/</a>                   | (Excoffier and Foll, 2011)                                               |
| ms, msms, msABC | coalescent simulations             | Building any arbitrary scenario using a coalescent framework | Any arbitrary scenario can be implemented. Handles SNP, microsatellites and sequence data. msms can include selection in the model.          | Can be difficult to handle for the naive user (but see coala)                                                                                                  | <a href="http://www.bio.lmu.de/~pavlidis/home/?Software:msABC">http://www.bio.lmu.de/~pavlidis/home/?Software:msABC</a> | (Hudson, 2002; Ewing and Hermisson, 2010; Pavlidis <i>et al.</i> , 2010) |
| scrm            | coalescent simulations             | Fast simulation of chromosome-scale sequences                | Syntax similar to ms, handles any arbitrary scenario                                                                                         | Does not handle gene conversion and fixed number of segregating sites (unlike ms)                                                                              | <a href="https://scrm.github.io/">https://scrm.github.io/</a>                                                           | (Staab <i>et al.</i> , 2015)                                             |
| ∂a∂i            | Diffusion approximation of the AFS | Model comparison and parameters estimation                   | Run time does not depend on the number of SNPs included, does not require coalescent simulations, handles arbitrarily complex scenarios      | Requires some knowledge of Python. Limited to 3 populations                                                                                                    | <a href="https://bitbucket.org/guttenkunstlab/dadi">https://bitbucket.org/guttenkunstlab/dadi</a>                       | (Gutenkunst <i>et al.</i> , 2009)                                        |
| DoRIS           | IBD tract                          | Testing various demographic scenario                         | Uses variation in IBD tracts length to test for various demographic models.                                                                  | IBD must be inferred first with, e.g., BEAGLE. Handles a limited set of demographic scenarios. Modification in the code is required for more complex scenarios | <a href="https://github.com/pierpal/DoRIS">https://github.com/pierpal/DoRIS</a>                                         | (Palamara and Pe'er, 2013)                                               |

|         |                                   |                                                                                                                              |                                                                                                                                                                                                    |                                                                                                                                                                         |                                                                                                                                         |                                 |
|---------|-----------------------------------|------------------------------------------------------------------------------------------------------------------------------|----------------------------------------------------------------------------------------------------------------------------------------------------------------------------------------------------|-------------------------------------------------------------------------------------------------------------------------------------------------------------------------|-----------------------------------------------------------------------------------------------------------------------------------------|---------------------------------|
| Unnamed | Identity by state tract           | Predict observed patterns of identity by state along a genome by fitting an appropriate, arbitrary complex demographic model | Allows bootstrapping and estimating confidence over parameter estimates with ms                                                                                                                    | Specific input format (similar to MSMC or ARGWeaver)                                                                                                                    | <a href="https://github.com/kellyharris/Inferring-demography-from-IBS">https://github.com/kellyharris/Inferring-demography-from-IBS</a> | (Harris and Nielsen, 2013)      |
| diCal2  | Sequentially Markovian coalescent | Testing any arbitrary demographic scenario                                                                                   | Works with smaller, more fragmented datasets than PSMC. Handles more complex demographic models than MSMC (including admixture). Allows to track population size changes in time without a priori. | Requires phased whole genome data and a model to be defined                                                                                                             | <a href="https://sourceforge.net/projects/dical2/">https://sourceforge.net/projects/dical2/</a>                                         | (Sheehan <i>et al.</i> , 2013)  |
| MSMC    | Sequentially Markovian coalescent | Inferring change in $N_e$ and migration rates with time between two populations                                              | Allows estimating variation in cross-coalescence rate between two populations                                                                                                                      | Limited to the study of 8 diploid individuals from 2 populations at once. Requires whole genome phased data and masking regions with insufficient sequencing depth      | <a href="https://github.com/stschiff/msmc">https://github.com/stschiff/msmc</a>                                                         | (Schiffels and Durbin, 2014)    |
| PSMC    | Sequentially Markovian coalescent | Inferring change in $N_e$ with time using a single diploid genome                                                            | Allows to track population size changes in time without a priori.                                                                                                                                  | Limited to one population and one diploid individual. Better used within MSMC. Requires phased whole genome data and masking regions with insufficient sequencing depth | <a href="https://github.com/lh3/psmc">https://github.com/lh3/psmc</a>                                                                   | (Li and Durbin, 2011)           |
| SMC++   | Sequentially Markovian coalescent | Inferring change in $N_e$ with time and splitting time between two populations                                               | Can analyze hundreds of individuals at a time and does not require phasing                                                                                                                         | The ancestral allele is assumed to be the reference allele by default. Assumes a clean split for populations divergence                                                 | <a href="https://github.com/popgenmethods/smcpp">https://github.com/popgenmethods/smcpp</a>                                             | (Terhorst <i>et al.</i> , 2016) |

Table 3. Summary of common methods for identifying loci under selection. Methods available in R are highlighted in bold.

| Software | Class of method | Purpose | Specifics | Issues and warnings | Link | Reference |
|----------|-----------------|---------|-----------|---------------------|------|-----------|
|----------|-----------------|---------|-----------|---------------------|------|-----------|

|           |                                       |                                                                               |                                                                                                                                                                                                                      |                                                                                                                                                                                            |                                                                                                       |                                                 |
|-----------|---------------------------------------|-------------------------------------------------------------------------------|----------------------------------------------------------------------------------------------------------------------------------------------------------------------------------------------------------------------|--------------------------------------------------------------------------------------------------------------------------------------------------------------------------------------------|-------------------------------------------------------------------------------------------------------|-------------------------------------------------|
| ARGWeaver | Ancestral recombination graphs        | Detecting selection by screening for variation in topology and age of alleles | Provides quantitative estimates for TMRCA and topologies at each locus. Can be used to infer demographic history. Especially useful to identify signature of long-term balancing selection (older coalescence times) | High computing cost. Requires phased whole-genome data.                                                                                                                                    | <a href="https://github.com/mdrasmus/argweaver">https://github.com/mdrasmus/argweaver</a>             | (Rasmussen <i>et al.</i> , 2014)                |
| GEMMA     | Association                           | Detecting association with environmental/phenotypic features                  | Computationally efficient for large scale datasets                                                                                                                                                                   | Imports data from PLINK format                                                                                                                                                             | <a href="http://www.xzlab.org/software.html">http://www.xzlab.org/software.html</a>                   | (Zhou and Stephens, 2012)                       |
| GENABEL   | Association                           | Detecting association with environmental/phenotypic features                  | <b>Modularity, facilitates correction for population structure/relatedness.</b>                                                                                                                                      | <b>Imports data from PLINK format</b>                                                                                                                                                      | <a href="http://www.genabel.org/">http://www.genabel.org/</a>                                         | (Aulchenko <i>et al.</i> , 2007)                |
| PLINK     | Association                           | Detecting association with environmental/phenotypic features                  | Handles a variety of tests for population structure and relatedness                                                                                                                                                  | Population structure/kinship need to be assessed prior association analysis                                                                                                                | <a href="http://pngu.mgh.harvard.edu/~purcell/plink/">http://pngu.mgh.harvard.edu/~purcell/plink/</a> | (Purcell <i>et al.</i> , 2007)                  |
| Trinculo  | Association                           | Detecting association with environmental/phenotypic features                  | Specifically designed to handle categorical variables with more than 2 categories. Performs multinomial logistic regression and provides frequentist and bayesian frameworks.                                        | Requires lapack library in Unix. Allows fine-mapping by testing for correlations between adjacent markers.                                                                                 | <a href="https://sourceforge.net/projects/trinculo/">https://sourceforge.net/projects/trinculo/</a>   | (Jostins and McVean, 2016)                      |
| SAMBADA   | Association/Environmental association | Detecting association with environmental/phenotypic features                  | Designed to be fast, underlying models have been kept simple. Allows conversion from PLINK format. Takes into account spatial autocorrelation of individual genotypes. Allows correction for population structure    | Does not work with pooled data. Possibly high levels of false positives. Relatedness between samples should be assessed independently. Should be used in combination with LFMM or BayPass. | <a href="http://asig.epfl.ch/sambada">http://asig.epfl.ch/sambada</a>                                 | (Stucki <i>et al.</i> , 2016)                   |
| discoal   | Coalescence                           | Simulate selective sweeps under arbitrary demographic scenarios               | More specifically designed for studying soft and hard sweeps                                                                                                                                                         | Redundant with msms                                                                                                                                                                        | <a href="https://github.com/kernlab/discoal">https://github.com/kernlab/discoal</a>                   | Publication embargoed (Kern and Schrider, 2016) |
| msms      | Coalescence                           | Simulate demographic scenarios including selection                            | Flexible, syntax similar to ms, handles arbitrarily complex models. Can be used in an ABC                                                                                                                            | Syntax can be difficult to handle for the naive user (but see coala)                                                                                                                       | <a href="http://www.mabs.at/ewing/msms/index.shtml">http://www.mabs.at/ewing/msms/index.shtml</a>     | (Ewing and Hermisson, 2010)                     |

|           |                                         |                                                              |                                                                                                                                                                                 |                                                                                                                                                |                                                                                                                                             |                                                                                                                           |
|-----------|-----------------------------------------|--------------------------------------------------------------|---------------------------------------------------------------------------------------------------------------------------------------------------------------------------------|------------------------------------------------------------------------------------------------------------------------------------------------|---------------------------------------------------------------------------------------------------------------------------------------------|---------------------------------------------------------------------------------------------------------------------------|
|           |                                         |                                                              | framework to include selection as a parameter to be estimated                                                                                                                   |                                                                                                                                                |                                                                                                                                             |                                                                                                                           |
| diCal-IBD | Coalescent with recombination/IBD       | Predicting IBD tracts from demographic models                | High IBD sharing suggests recent positive selection.                                                                                                                            | Uses diCal output to obtain expectations based on demographic scenarios                                                                        | <a href="https://sourceforge.net/projects/dical-ibd/">https://sourceforge.net/projects/dical-ibd/</a>                                       | <a href="https://www.ncbi.nlm.nih.gov/pmc/articles/PMC4296155/">https://www.ncbi.nlm.nih.gov/pmc/articles/PMC4296155/</a> |
| SweeD     | Composite Likelihood test               | Designed for whole genome data (or large continuous regions) | Supports Fasta and VCF formats. Estimates for selection coefficients. Designed for detecting recent positive selection. Claims to be more precise at identifying selected sites | Better suited for whole genome datasets<br><br>Requires whole-genome data. The ancestral state of alleles must be obtained through an outgroup | <a href="http://pop-gen.eu/wordpress/software/sweeD">http://pop-gen.eu/wordpress/software/sweeD</a>                                         | (Degiorgio <i>et al.</i> , 2016)                                                                                          |
| SCCT      | Conditional coalescent tree             | Detecting positive selection                                 | <b>Corrects for population structure using latent factors, faster than BAYENV for large datasets</b>                                                                            | <b>Only performs association with environment</b>                                                                                              | <a href="https://github.com/wavefancy/scct">https://github.com/wavefancy/scct</a>                                                           | (Wang, Huang, <i>et al.</i> , 2014)                                                                                       |
| LFMM      | Environmental association               | Detecting adaptation to environmental features               |                                                                                                                                                                                 |                                                                                                                                                | <a href="http://membres-timc.imag.fr/Olivier.Francois/lfmm/software.htm">http://membres-timc.imag.fr/Olivier.Francois/lfmm/software.htm</a> | (Frichot <i>et al.</i> , 2013)                                                                                            |
| H12 test  | LD                                      | Detecting selection using signatures of high LD              | Does not require phased data. Designed for detecting soft sweeps                                                                                                                | Coalescent simulations are recommended to evaluate the likelihood of selection                                                                 | <a href="https://github.com/ngarud/SelectionHapStats/">https://github.com/ngarud/SelectionHapStats/</a>                                     | (Garud <i>et al.</i> , 2015)                                                                                              |
| LDna      | LD                                      | Detecting selection using signatures of high LD              | <b>Can be used to address population structure or detect large inversions or indel polymorphism through LD</b>                                                                  | <b>The user needs to play with parameters to ensure robustness of SNPs significantly linked</b>                                                | <a href="https://github.com/petrikempainen/LDna">https://github.com/petrikempainen/LDna</a>                                                 | (Kempainen <i>et al.</i> , 2015)                                                                                          |
| rehh      | LD                                      | Detecting selection using signatures of high LD              | <b>Can compute both XP-EHH and Rsb. Handles several input formats</b>                                                                                                           | <b>Requires phased data and high density of markers</b>                                                                                        | <a href="https://cran.r-project.org/web/packages/rehh/index.html">https://cran.r-project.org/web/packages/rehh/index.html</a>               | (Gautier and Vitalis, 2012)                                                                                               |
| Selscan   | LD                                      | Detecting selection using signatures of high LD              | Includes the nSL statistics dedicated to soft sweep detection                                                                                                                   | Does not include utilities to specify the ancestral state of alleles. Requires phased data and high density of markers                         | <a href="https://github.com/szpiech/selscan">https://github.com/szpiech/selscan</a>                                                         | (Szpiech and Hernandez, 2014)                                                                                             |
| BALLET    | Likelihood test for balancing selection | Detecting balancing selection                                | Designed for detecting ancient balancing selection. Does not require phasing                                                                                                    | Requires whole-genome data and recombination map. The ancestral state of alleles must be obtained through an outgroup                          | <a href="http://www.personal.psu.edu/mxd60/ballet.html">http://www.personal.psu.edu/mxd60/ballet.html</a>                                   | (DeGiorgio <i>et al.</i> , 2014)                                                                                          |

|                 |                                        |                                                                       |                                                                                                                                                                                                                                                                                           |                                                                                                                                                                            |                                                                                                                                                                                                                                                      |                                         |
|-----------------|----------------------------------------|-----------------------------------------------------------------------|-------------------------------------------------------------------------------------------------------------------------------------------------------------------------------------------------------------------------------------------------------------------------------------------|----------------------------------------------------------------------------------------------------------------------------------------------------------------------------|------------------------------------------------------------------------------------------------------------------------------------------------------------------------------------------------------------------------------------------------------|-----------------------------------------|
| Bayescan        | Population differentiation             | Detecting positive selection and local adaptation                     | Incorporates uncertainty on allele frequencies due to low sample sizes                                                                                                                                                                                                                    | Sensitive to priors on the ratio of selected/neutral sites. False positive rates can be high under scenarios of demographic expansion, admixture and isolation by distance | <a href="http://cmpg.unibe.ch/software/BayScan/">http://cmpg.unibe.ch/software/BayScan/</a>                                                                                                                                                          | (Foll and Gaggiotti, 2008)              |
| FDIST2          | Population differentiation             | Detecting positive selection and local adaptation                     | Allows to control for hierarchical population structure                                                                                                                                                                                                                                   | False positive rate is high when an island model cannot be assumed                                                                                                         | <a href="http://datadryad.org/research/object/doi:10.5061/dryad.v8d05">http://datadryad.org/research/object/doi:10.5061/dryad.v8d05</a>                                                                                                              | (Beaumont and Balding, 2004)            |
| PCAdapt         | Population differentiation             | Detecting positive selection and local adaptation                     | Does not require to define populations. Handles admixed populations and pooled datasets<br>Can estimate the coefficients of selection. Calibration using a pseudo-observed dataset to obtain (can be used in combination with the R function <code>simulate.baypass()</code> in BayPass). | False positive rate can be high                                                                                                                                            | <a href="http://membres-timc.imag.fr/Michael.Blum/PCAdapt.html">http://membres-timc.imag.fr/Michael.Blum/PCAdapt.html</a>                                                                                                                            | (Duforet-Frebourg <i>et al.</i> , 2016) |
| SelEstim        | Population differentiation             | Detecting positive selection and local adaptation                     |                                                                                                                                                                                                                                                                                           | Assumes an island model.                                                                                                                                                   | <a href="http://www1.montpellier.inra.fr/CBGP/software/selestim/">http://www1.montpellier.inra.fr/CBGP/software/selestim/</a>                                                                                                                        | (Vitalis <i>et al.</i> , 2014)          |
| Bayenv, BayPass | Population differentiation/Association | Detecting positive selection and adaptation to environmental features | Less sensitive to population demographic history than previous methods. Handle pooled datasets                                                                                                                                                                                            | Significance thresholds need to be determined from pseudo-observed datasets. Calibration with neutral SNPs is recommended. BayPass better estimates the kinship matrix     | <a href="http://www1.montpellier.inra.fr/CBGP/software/baypass/">http://www1.montpellier.inra.fr/CBGP/software/baypass/</a> ;<br><a href="https://bitbucket.org/tguenther/bayenv2_public/src">https://bitbucket.org/tguenther/bayenv2_public/src</a> | (Günther and Coop, 2013; Gautier, 2015) |
| FLK             | Population differentiation/Association | Detecting positive selection and local adaptation                     | Less sensitive to population demographic history than previous methods                                                                                                                                                                                                                    | Requires an outgroup population                                                                                                                                            | <a href="https://qgsp.jouy.inra.fr/index.php?option=com_content&amp;view=article&amp;id=50&amp;Itemid=55">https://qgsp.jouy.inra.fr/index.php?option=com_content&amp;view=article&amp;id=50&amp;Itemid=55</a>                                        | (Bonhomme <i>et al.</i> , 2010)         |
| POPBAM          | Summary statistics                     | Detecting selection using AFS, differentiation                        | Extracts summary statistics directly from BAM files                                                                                                                                                                                                                                       | Does not allow for sophisticated filtering and SNP calling                                                                                                                 | <a href="http://popbam.sourceforge.net/">http://popbam.sourceforge.net/</a>                                                                                                                                                                          | (Garrigan, 2013)                        |
| POPGenome       | Summary statistics                     | Detecting selection using AFS, differentiation                        | Fast, embedded in R, allows using annotation files (GFF/GTF format).                                                                                                                                                                                                                      | Does not perform association, but can be used in combination with GENABEL within R                                                                                         | <a href="https://cran.r-project.org/web/packages/PopGenome/index.html">https://cran.r-project.org/web/packages/PopGenome/index.html</a>                                                                                                              | (Pfeifer <i>et al.</i> , 2014)          |

|                |                                |                                                                                    |                                                                                                               |                                                                                         |                                                                                                           |                                     |
|----------------|--------------------------------|------------------------------------------------------------------------------------|---------------------------------------------------------------------------------------------------------------|-----------------------------------------------------------------------------------------|-----------------------------------------------------------------------------------------------------------|-------------------------------------|
| VCFTOOLS       | Summary statistics             | Detecting selection using AFS, differentiation                                     | Extracts summary statistics from VCF files. Also allows VCF filtering and conversion                          | Set of summary statistics not as extensive as PopGenome                                 | <a href="http://vcftools.sourceforge.net/">http://vcftools.sourceforge.net/</a>                           | (Danecek <i>et al.</i> , 2011)      |
| ANGSD          | Summary statistics/Association | Detecting selection using AFS, differentiation, association with functional traits | Allows for association using generalized linear models                                                        | Descriptive statistics. P-values need to be evaluated through coalescent simulations.   | <a href="http://www.popgen.dk/angsd/index.php/ANGSD">http://www.popgen.dk/angsd/index.php/ANGSD</a>       | (Korneliussen <i>et al.</i> , 2014) |
| TASSEL         | Summary statistics/Association | Detecting association with phenotype                                               | User friendly (Java interface), corrects for relatedness, allows computing summary statistics (LD, diversity) | Requires relatedness to be assessed externally (with e.g. STRUCTURE)                    | <a href="http://www.maizegenetics.net/tassel">http://www.maizegenetics.net/tassel</a>                     | (Korneliussen <i>et al.</i> , 2014) |
| selectionTools | Summary statistics/LD          | Detecting selection using AFS, differentiation and LD statistics                   | Allows combining several tools in a single pipeline. Includes phasing tools.                                  | Set of available summary statistics remains limited (same as VCFtools + Fay and Wu's H) | <a href="https://github.com/MerrimanLab/selectionTools">https://github.com/MerrimanLab/selectionTools</a> | (Cadzow <i>et al.</i> , 2014)       |

## Figures

Figure 1. A possible general pipeline for analysing population genomics data using methods described in this paper. In red are indicated options that are generally not suited for pool-seq data. In green are indicated steps that require genome-wide datasets. ARG: Ancestral Recombination Graph (see main text).

Figure 2. Set of questions and relevant methods to characterize population structure and local adaptation. Proposed methods mostly use common data formats for input files, facilitating their integration in a single pipeline. PGDSpider (Lischer and Excoffier, 2012) can be used to automate file conversion for methods requiring private input format. The proposed methods are not exhaustive, see tables for a more detailed list.

Figure 3: Set of questions and relevant methods to characterize demography and selection. \*: requires reference genome; \*\* requires reference genome and whole genome resequencing.

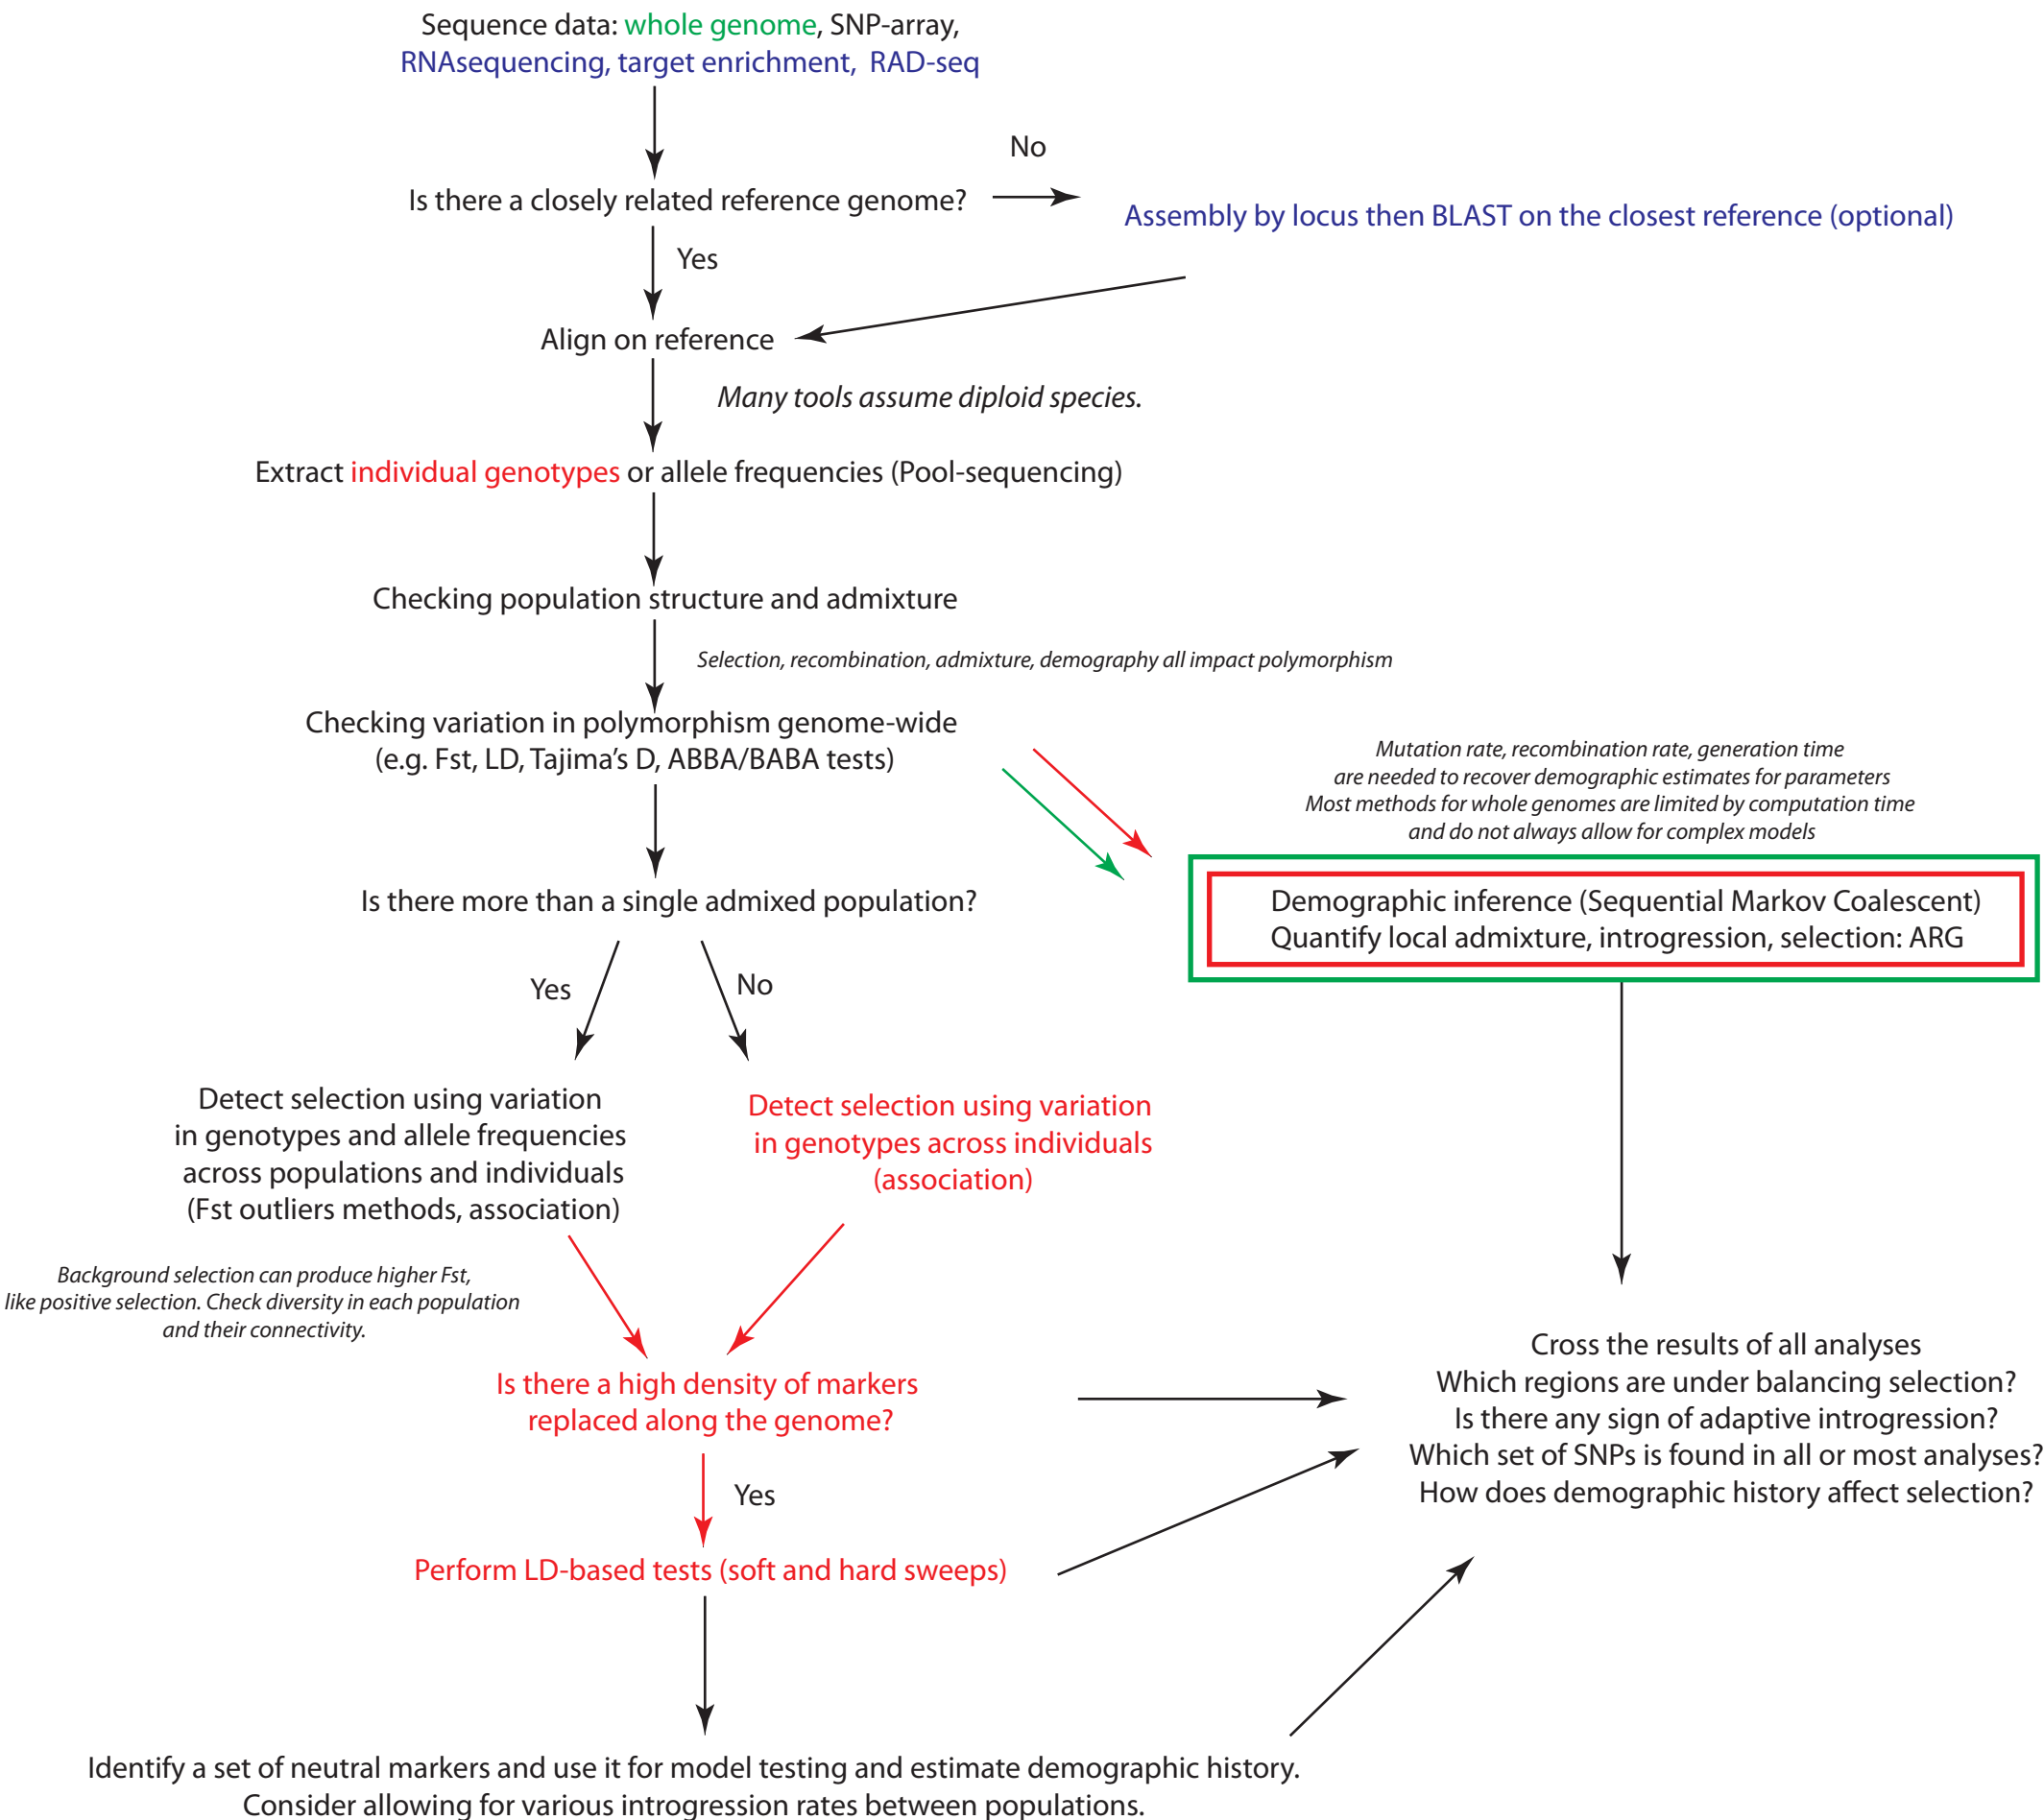

|         | Question                                                                                  | Data format                                                | Software                                                                                                                                                                                                                                            |
|---------|-------------------------------------------------------------------------------------------|------------------------------------------------------------|-----------------------------------------------------------------------------------------------------------------------------------------------------------------------------------------------------------------------------------------------------|
| informs | Is the dataset structured ?<br>Is there inbreeding ?<br>Characterizing hybridization      | FASTQ (RAD-sequencing)                                     | STACKS. Outputs F-statistics and estimators of effective population size ( $\pi$ ).                                                                                                                                                                 |
|         |                                                                                           | VCF                                                        | VCFTOOLS/POPGENOME: relatedness between individuals, FST between populations, Hardy-Weinberg equilibrium<br>Nucleotide diversity and estimates of effective population sizes. Signatures of population size change.<br>PCA methods (SNPRelate in R) |
|         |                                                                                           | PLINK PED/BED file                                         | fastSTRUCTURE, sNMF, ADMIXTURE. Provide coefficients of coancestry for each individual.<br>Familial relationships: KING, PLINK.                                                                                                                     |
|         |                                                                                           | Private format<br>(convertible from VCF<br>with PGDspider) | Arlequin/Genepop: testing hierarchical structure of populations (AMOVA), FIS, FST.                                                                                                                                                                  |
|         | How does environment impact<br>this structure and historical dispersal ?                  | VCF, PLINK PED/BED format                                  | adegenet and LEA packages in R. Highlight barriers to gene flow in the landscape.                                                                                                                                                                   |
|         |                                                                                           | Private format                                             | BEDASSLE. Identifies environmental features limiting gene flow.<br>GENELAND. Highlight barriers to gene flow in the landscape.                                                                                                                      |
|         | Is there any association<br>of specific loci with environment /<br>a relevant phenotype ? | VCF, PLINK PED/BED format                                  | GENABEL, TRINCULO (individual phenotypes)<br>LFMM (LEA package)                                                                                                                                                                                     |
|         |                                                                                           | PLINK PED/BED format                                       | SAMBADA                                                                                                                                                                                                                                             |
|         |                                                                                           | Private format<br>(convertible from VCF<br>with PGDspider) | BAYENV                                                                                                                                                                                                                                              |
|         |                                                                                           |                                                            |                                                                                                                                                                                                                                                     |

|         | Question                                                                                                                              | Data format                                               | Software                                                                                                                |
|---------|---------------------------------------------------------------------------------------------------------------------------------------|-----------------------------------------------------------|-------------------------------------------------------------------------------------------------------------------------|
| informs | How does selection shape genome variation?                                                                                            | VCF                                                       | VCFTOOLS, POPGENOME. Output diversity and LD statistics                                                                 |
|         |                                                                                                                                       | Modified IMPUTE format<br>(can be obtained from VCFTOOLS) | R package rehh. LD-based tests of haplotype extension *                                                                 |
|         |                                                                                                                                       | Private format (PGDSpider from VCF)                       | BAYENV. FST-outlier method                                                                                              |
|         |                                                                                                                                       | VCF and PLINK PED/BED files                               | PCAdapt. List loci atypically related to population structure                                                           |
|         |                                                                                                                                       | Private format                                            | ARGWeaver. Returns coalescence times and other statistics for non-recombining blocks along the genome. **               |
|         | Does population history shape potential for adaptation (e.g. admixture bringing new alleles, bottleneck reducing genetic diversity) ? | PLINK PED/BED file                                        | TreeMix. Identifies admixture events, their magnitude and direction between populations                                 |
|         |                                                                                                                                       | Private format (Arlequin, PGDSpider from VCF)             | Fastsimcoal and R package abc. ABC and Likelihood methods for comparing arbitrarily complex demographic models          |
|         |                                                                                                                                       | VCF                                                       | SMC methods. SMC++ (no phasing). **<br>Variation in effective population sizes and divergence times between populations |
|         | Origin of genomic islands of differentiation.<br>Characterizing adaptive introgression.                                               | VCF                                                       | VCFTOOLS, POPGENOME. Output divergence statistics.                                                                      |
|         |                                                                                                                                       | PLINK                                                     | FineStructure. Identifies introgressed blocks along the genome and estimates times since admixture *                    |
|         |                                                                                                                                       | BEAGLE (after phasing from VCF)                           | PCAdmix. Identifies introgressed blocks along the genome *                                                              |
|         |                                                                                                                                       | Private format                                            | ARGWeaver. Returns coalescence times and other statistics for non-recombining blocks along the genome. **               |
